# Supplementary material
Source: Elsevier journal article supplement (https://www.sciencedirect.com/science/article/pii/S0300893220306886)
Supplement: mmc1 [file mmc1.pdf]

## **MATERIAL ADICIONAL**

### **Métodos**

Organización del comité redactor del documento y proceso de revisión del documento:

El desarrollo del documento de consenso sobre el tratamiento de los factores de riesgo cardiovascular de pacientes con cáncer es un proyecto conjunto de:

- Grupo de Trabajo de Cardio-Oncología de la Sociedad Española de Cardiología. De la Sociedad Española de Cardiología (SEC) participaron también representantes de los grupos de trabajo de Diabetes y Obesidad y de Mujeres en Cardiología, así como de diferentes asociaciones científicas (Cardiología Clínica, Imagen Cardíaca, Insuficiencia Cardíaca, Cardiología Geriátrica, Riesgo Cardiovascular y Rehabilitación, Cardiología Pediátrica).
- Sociedad Española de Hematología y Hemoterapia (SEHH)
- Sociedad Española de Oncología Médica (SEOM)
- Sociedad Española de Oncología Radioterápica (SEOR)
- Sociedad Española de Médicos Generales y de Familia (SEMG)
- Asociación Española de Especialistas en Medicina del Trabajo (AEEMT)
- Asociación Española de Enfermería Cardiovascular (AEEC)

- Fundación Española del Corazón (FEC)
- Asociación Española Contra el Cáncer (AECC)

En reunión presencial celebrada en la Casa del Corazón, sede de la SEC, con representantes de las asociaciones mencionadas, se acordaron los objetivos del documento, la estructura por desarrollar, el calendario de elaboración y la participación de los expertos en los comités de redacción y revisión. Todos los expertos participantes en la elaboración del documento recibieron el acta de la reunión y se les brindó la posibilidad de aportar comentarios y sugerencias.

Los expertos encargados de redactar el contenido realizaron una revisión exhaustiva de la literatura científica publicada en PubMed desde 1980 hasta la actualidad. Se emplearon palabras clave y encabezados de temas médicos (*Medical Subject Headings* [MESH]) como: "Cardio-Oncology, Cardiotoxicity, Antineoplastic Agents, Chemotherapy, Vascular toxicity, Radiotherapy, Cardiovascular Diseases, Cardiovascular Risk Factors, Cardiovascular System, Atherosclerosis, Pediatrics, Neoplasms". Se consideraron por orden de preferencia, de mayor a menor, trabajos derivados de metanálisis, estudios clínicos aleatorizados, estudios de cohortes prospectivos, retrospectivos y de casos y controles, así como recomendaciones de práctica clínica, revisiones y opiniones de expertos. Asimismo, se revisó la bibliografía de los trabajos valorados con el objetivo de encontrar artículos relevantes.

Tras la redacción de cada apartado, los autores mantuvieron reuniones telemáticas con el objetivo de unificar y acordar una versión definitiva. Tras la armonización de todos los apartados desarrollados, se elaboró una versión completa del documento que se remitió para revisión a todos los autores del documento y se solicitaron comentarios y correcciones del contenido, que finalmente se incluyeron en la versión final del documento.

## **Proceso de consenso**

### *Proceso Delfos*

Comité científico de expertos: Manuel Anguita, Meritxell Arenas, Vicente Arrarte, Antonio Castro, Raúl Córdoba, Isabel Egonechea, Carlos Escobar, Teresa López Fernández, Pilar Mazón, Ana Martín García, Cristina Mitroi, Juan Virizuela y Eduardo Zatarain.

Todos los autores del Documento configuraron el panel de expertos que participó en las dos rondas del proceso Delfos para llegar a un consenso en las recomendaciones finales.

### *Selección de las cuestiones que analizar con el método Delfos*

El comité científico de expertos llevó a cabo una revisión sistemática de la literatura científica para desarrollar la primera lista de cuestiones para el cuestionario Delfos.

*Ronda 1.* Los miembros del panel de expertos evaluaron la inclusión de las recomendaciones propuestas mediante un cuestionario *online* en plataforma *web*. Se solicitó a los miembros del panel que ponderaran su nivel de acuerdo con cada recomendación del cuestionario con una escala Likert entre 1 punto (completamente en desacuerdo) y 9 puntos (completamente de acuerdo).

También se solicitó a los panelistas a que reflejaran sus comentarios después de calificar cada recomendación.

Tras el análisis de los datos, se presentaron y debatieron los resultados. La selección de las recomendaciones se basó en la aceptación de los ítems del cuestionario por más del 90% del panel de expertos y en el acuerdo del comité científico. Las

recomendaciones que no lograron el 90% de acuerdo fueron eliminadas o modificadas según la información proporcionada por el panel de expertos. Después de completar la primera ronda, las recomendaciones redundantes se agruparon y redujeron y las cuestiones relativas a la comprensión de algunas recomendaciones se modificaron con base en las observaciones de los expertos. El cuestionario actualizado se redistribuyó a los panelistas en la segunda ronda.

*Ronda 2.* En la segunda ronda, se pidió a los mismos miembros del panel de expertos que, utilizando el mismo método de votación, evaluaran la lista de recomendaciones que, tras no haber sido objeto de consenso en la primera ronda, habían sido modificadas. Tras analizar las respuestas del mismo modo que el descrito para la primera ronda, todas las recomendaciones cumplieron el acuerdo de los expertos (> 90%) con un promedio de aceptación del 98%, por lo que no fue preciso realizar una tercera ronda. Se realizó un análisis estadístico descriptivo de los datos obtenidos de la evaluación de las recomendaciones del cuestionario Delphi por el panel de expertos en las rondas 1 y 2. Se calculó la distribución de frecuencias de las respuestas del panel en la escala de 9 puntos para establecer el nivel de consenso para cada ítem del cuestionario. Cada recomendación se clasificó según las puntuaciones como rechazada (1-3 puntos), indeterminada (4-6 puntos) o aceptada (7-9 puntos). Tras las dos rondas del método Delfos, el promedio de aceptación alcanzado fue del 98%, y ninguna recomendación estuvo por debajo del 92% (figura 1 del material adicional).

**Figura 1 del material adicional.** Resultados del proceso de consenso de las recomendaciones finales mediante el método Delfos. En la figura se recoge el grado de acuerdo de cada una de las recomendaciones finales tras las dos rondas del método Delfos. Para ser aceptada, se exigió que cada recomendación alcanzara un grado de acuerdo de al menos el 90%. El grado de acuerdo medio de las recomendaciones ascendió al 98%. ARA-II: antagonistas del receptor de la angiotensina II; DM: diabetes mellitus; ECG: electrocardiograma; FRCV: factores de riesgo cardiovascular; IECA: inhibidores de la enzima de conversión de la angiotensina; LDL: lipoproteínas de baja densidad; PA: presión arterial; RCV: riesgo cardiovascular; TOH: tratamiento onco-hematológico.

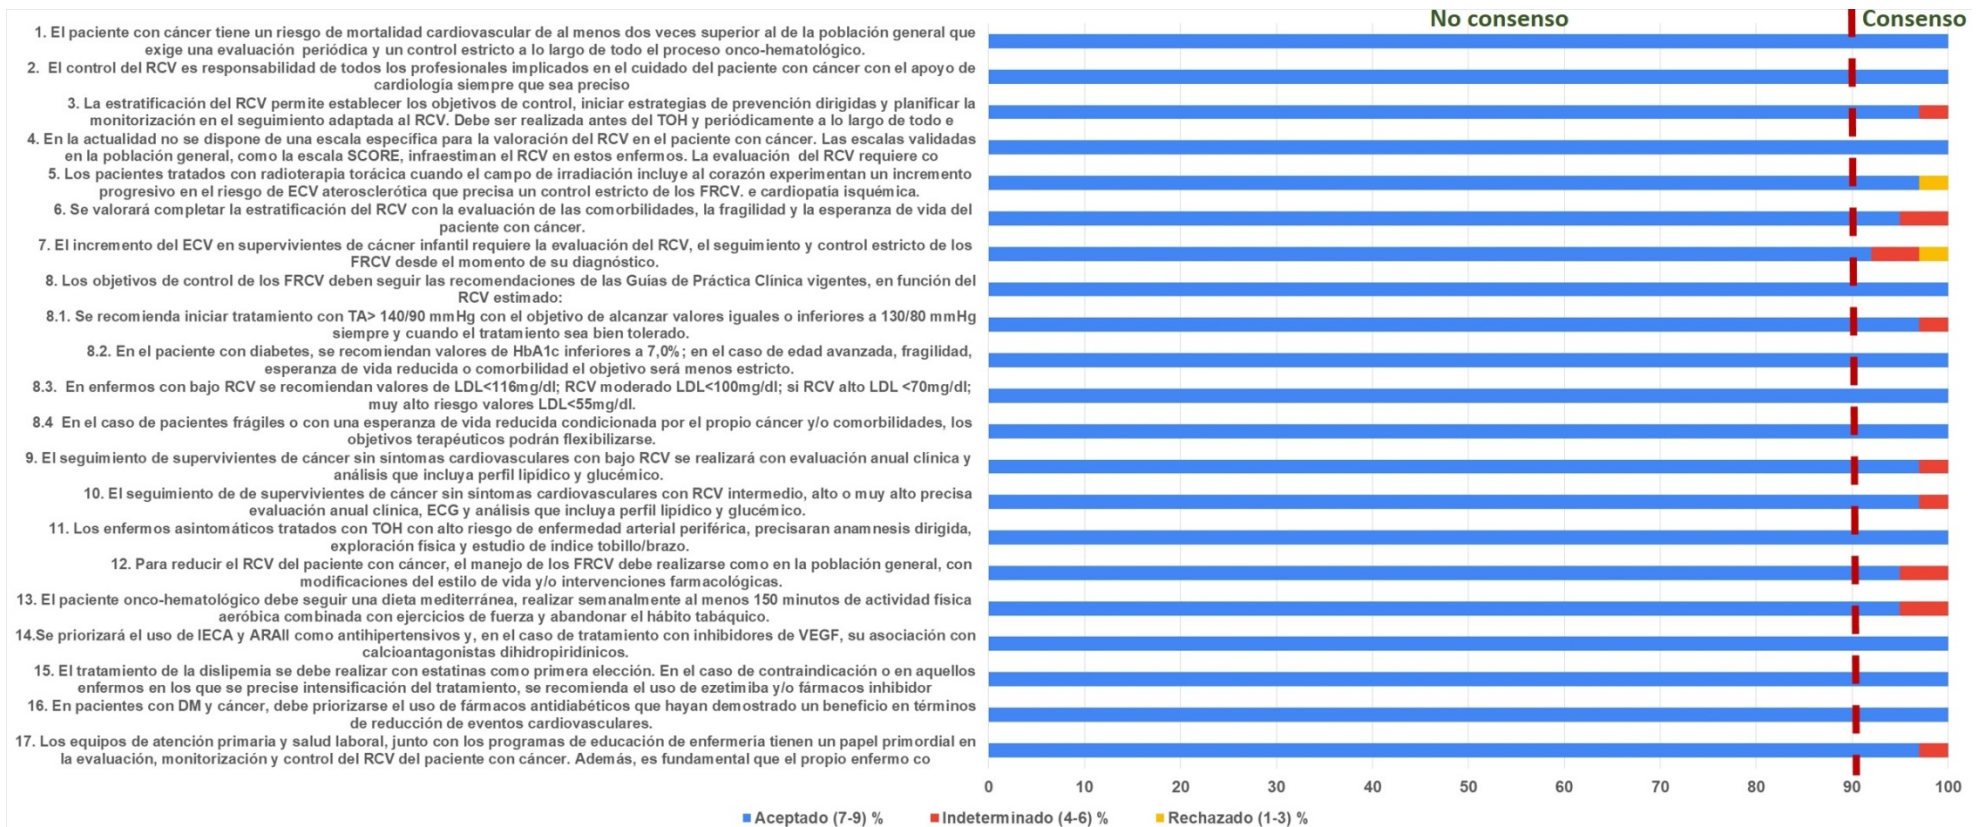

**Tabla 1 del material adicional**

Sociedades científicas y representantes que han participado y certifican el documento de consenso

|                                                       |                                                                                                                                                                                                                                                                                                                                                                                                                                                                                                                                                                  |
|-------------------------------------------------------|------------------------------------------------------------------------------------------------------------------------------------------------------------------------------------------------------------------------------------------------------------------------------------------------------------------------------------------------------------------------------------------------------------------------------------------------------------------------------------------------------------------------------------------------------------------|
| Sociedad Española de Cardiología (SEC)                | Teresa López Fernández, Ana Martín García, Cristina Mitroi, Pilar Mazón Ramos, Dimpna Albert, Manuel Anguita Sánchez, Vicente Ignacio Arrarte Esteban, Clara Bonanand Lozano, Almudena Castro, Antonio Castro Fernández, Juan Cosín-Sales, Marinela Chaparro-Muñoz, Regina Dalmau, Lucía Deiros Bronte, Pablo Díez-Villanueva, Carlos Escobar Cervantes, Teresa Lozano, Amparo Martínez Monzonis, Dolores Mesa, Gerard Oristrell, Milagros Pedreira, José María Serrano Antolín, Belén Toral, Sonia Velasco del Castillo, Eduardo Zatarain-Nicolás, Juan Tamargo |
| Sociedad Española de Hematología y Hemoterapia (SEHH) | Ramón García Sanz, Raúl Córdoba, Pascual Marco Vera                                                                                                                                                                                                                                                                                                                                                                                                                                                                                                              |
| Sociedad Española de Oncología Médica (SEOM)          | Juan Antonio Virizuela, Francisco Ayala de la Peña                                                                                                                                                                                                                                                                                                                                                                                                                                                                                                               |
| Sociedad Española de Oncología Radioterápica (SEOR)   | Meritxell Arenas, Isabel Rodríguez, Laura Torres Royo                                                                                                                                                                                                                                                                                                                                                                                                                                                                                                            |

|                                                                      |                                                 |
|----------------------------------------------------------------------|-------------------------------------------------|
| Sociedad Española de Médicos Generales y de Familia (SEMG)           | Isabel Egocheaga Cabello, Yasmin Drak Hernández |
| Asociación Española de Especialistas en Medicina del Trabajo (AEEMT) | Teófila Vicente-Herrero, Luis Reinoso Barbero   |
| Asociación Española de Enfermería Cardiovascular (AEEC)              | Concepción Fernández Redondo                    |
| Fundación Española del Corazón (FEC)                                 | José Luis Palma Gámiz                           |
| Asociación Española contra el Cáncer (AECC)                          | Estíbaliz García Rodríguez                      |



**Tabla 2 del material adicional**

Fármacos antitumorales relacionados con la aparición de FRCV o enfermedad vascular precoz clasificados en función de su uso en diferentes tipos de neoplasias

| Toxicidad cardiovascular                        | Neoplasia                                           | Fármacos                                                                                                                                                                                                                |
|-------------------------------------------------|-----------------------------------------------------|-------------------------------------------------------------------------------------------------------------------------------------------------------------------------------------------------------------------------|
| Enfermedad coronaria y aterosclerosis acelerada | Cabeza y cuello                                     | Antimetabolito (5-FU, capecitabina, tegafur); antibióticos (bleomicina); alquilantes (cisplatino, ifosfamida); antiangiogénicos VEGFi (bevacizumab)                                                                     |
|                                                 | Mama                                                | Antimetabolito (5-FU, capecitabina, gemcitabina, tegafur); antiangiogénicos VEGFi (bevacizumab), inhibidores de la aromatasa (anastrozol, letrozol); alquilantes (ciclofosfamida)                                       |
|                                                 | Pulmón                                              | Antiangiogénicos VEGFi (bevacizumab), erlotinib, nintedanib, antimetabolito (capecitabina, gemcitabina), alquilante (ifosfamida)                                                                                        |
|                                                 | Digestivo (gastrointestinal, pancreático, hepático) | Antimetabolito (5-FU, capecitabina, gemcitabina, tegafur), antiangiogénicos VEGFi (bevacizumab, aflibercept), antimicrotúbulos (taxanos), erlotinib, alquilantes (cisplatino), inhibidor de la tirosinasa (regorafenib) |
|                                                 | Ginecológico                                        | Antiangiogénicos VEGFi (bevacizumab); antimetabolito (gemcitabina), alquilante (ifosfamida)                                                                                                                             |

|                                                  |                                                                                                                                                                                                               |
|--------------------------------------------------|---------------------------------------------------------------------------------------------------------------------------------------------------------------------------------------------------------------|
| Próstata                                         | Antiangiogénicos VEGFi (bevacizumab), privación androgénica (agonistas de la LHRH, abiraterona), estramustina                                                                                                 |
| Sarcoma                                          | Antiangiogénicos VEGFi (bevacizumab), alquilante (ifosfamida)                                                                                                                                                 |
| Genitourinario (riñón, vejiga, testículos, etc.) | Inhibidores de la tirosincinasa (pazopanib); antimicrotúbulos (taxanos y alcaloides de la vinca); antibióticos (bleomicina); aldesleukina; alquilantes (cisplatino, ifosfamida); antimetabolito (gemcitabina) |
| Melanoma                                         | Aldesleukina, inhibidor de la tirosincinasa (sorafenib)                                                                                                                                                       |
| Neuroendocrinos                                  | Antimetabolito (capecitabina)                                                                                                                                                                                 |
| Leucemia aguda                                   | Inhibidor de la tirosincinasa BCR-ABL (nilotinib, ponatinib, dasatinib), alcaloides de la vinca (vincristina), tretinoína, aldesleukina, análogo pirimidina (citarabina), idarubicina                         |
| Linfomas                                         | Alquilante (bendamustina), antimetabolitos (gemcitabina), alquilantes (ciclofosfamida, cisplatino, ifosfamida, bendamustina); alcaloides de la vinca (vincristina)                                            |
| LMC                                              | Inhibidor de la tirosincinasa BCR-ABL (dasatinib, nilotinib, ponatinib)                                                                                                                                       |
| LLC                                              | Alquilante (bendamustina), anticuerpo monoclonal (obinutuzumab, ofatumumab)                                                                                                                                   |

|     |                                                               |                                                                                                                                                                                                                          |
|-----|---------------------------------------------------------------|--------------------------------------------------------------------------------------------------------------------------------------------------------------------------------------------------------------------------|
|     | Mieloma                                                       | Inhibidores del proteasoma (carfilzomib, bortezomib), alquilante (bendamustina, cisplatino, ciclofosfamida), inmunomoduladores (lenalidomida), inhibidor de histona deacetilasa (panobinostat)                           |
|     | TPH                                                           | Acondicionamiento: inhibidor de la topoisomerasa I (etopósido).<br>Mantenimiento: inhibidor de la tirosincinasa anti-BCR-ABL (nilotinib, ponatinib, dasatinib). EICH: alquilantes (ciclofosfamida)                       |
| HTA | Cabeza y cuello                                               | Inhibidores de la tirosincinasa (sorafenib, vandetanib, lenvatinib, cabozantinib, pazopanib); antiangiogénicos VEGFi (bevacizumab), alquilantes (cisplatino); ICI (pembrolizumab [PD-1]), taxanos                        |
|     | Mama                                                          | Antiangiogénicos VEGFi (bevacizumab), inhibidor de aromatasa, alquilantes (ciclofosfamida), taxanos                                                                                                                      |
|     | Pulmón                                                        | Antiangiogénicos VEGFi (bevacizumab), nintedanib, taxanos                                                                                                                                                                |
|     | Digestivo (gástrico, intestinal, pancreático, hepático, etc.) | Inhibidores de la tirosincinasa (sorafenib, regorafenib, axitinib, vandetanib, lenvatinib, regorafenib, cabozantinib); antiangiogénicos VEGFi (bevacizumab, aflibercept); alquilantes (cisplatino); panitumumab, taxanos |
|     | Ginecológico                                                  | Antiangiogénicos VEGFi (bevacizumab)                                                                                                                                                                                     |
|     | Próstata                                                      | Antiangiogénicos VEGFi (bevacizumab), hormonoterapia (abiraterona; enzalutamida); taxanos                                                                                                                                |

|                                                  |                                                                                                                                                                                                                                                    |
|--------------------------------------------------|----------------------------------------------------------------------------------------------------------------------------------------------------------------------------------------------------------------------------------------------------|
| Sarcoma                                          | Antiangiogénicos VEGFi (bevacizumab); inhibidores de la tirosincinasa (pazopanib, sorafenib, sunitinib, lenvatinib, vandetanib, cabozantinib, pazopanib), taxanos                                                                                  |
| Genitourinario (riñón, vejiga, testículos, etc.) | Inhibidores de la tirosincinasa (sunitinib, sorafenib, axitinib, pazopanib, lenvatenib); inhibidores de mTOR (everolimus, temsirolimus); alquilantes (cisplatino), antimicrotúbulos (vinblastina); ICI (pembrolizumab [PD-1]), taxanos             |
| Melanoma                                         | Inhibidores de la tirosincinasa (dabrafenib, encorafenib, trametinib, cobimetinib, binimetinib); ICI (nivolumab); ICI (pembrolizumab [PD-1]); taxanos                                                                                              |
| Neuroendocrinos GIST                             | Inhibidores de la tirosincinasa (sunitinib, regorafenib); antiangiogénicos VEGFi (bevacizumab)                                                                                                                                                     |
| Leucemia aguda                                   | Inhibidor de la tirosincinasa anti-BCR-ABL (ponatinib, dasatinib); blinatumomab; tretinoína                                                                                                                                                        |
| Linfoma, LLC, LMC                                | Inhibidores de la tirosincinasa (ibrutinib, nilotinib, dasatinib, ponatinib, bosutinib, copanlisib); busulfano; alquilantes (cisplatino); 90Y-ibritumomab; anticuerpo monoclonal (obinutuzumab, ofatumumab, rituximab); ICI (pembrolizumab [PD-1]) |

|                   |                                                               |                                                                                                                                                                                                                                                                                                               |
|-------------------|---------------------------------------------------------------|---------------------------------------------------------------------------------------------------------------------------------------------------------------------------------------------------------------------------------------------------------------------------------------------------------------|
|                   | MM                                                            | Inmunomoduladores (lenalidomida; pomalidomida); inhibidores del proteosoma (bortezomib, carfilzomib); anticuerpo monoclonal (daratumumab, elotuzumab); antiangiogénicos VEGFI (bevacizumab); alquilante (cisplatino, bendamustina); inhibidor de la histona deacetilasa (panobinostat)                        |
|                   | TPH                                                           | Acondicionamiento: tiotepa, inmunosupresores: inhibidores de calcineurina (ciclosporina, tacrolimus), inhibidor de mTOR (sirolimus, temsirolimus, everolimus). Mantenimiento: inhibidores de la tirosincinasa anti-BCR-ABL (nilotinib, ponatinib, dasatinib). EICH: inhibidor de la tirosincinasa (ibrutinib) |
|                   | Mielofibrosis/policitemia                                     | Ruxolitinib                                                                                                                                                                                                                                                                                                   |
|                   | Tratamientos adyuvantes                                       | Corticoides; estimuladores de la eritropoyesis                                                                                                                                                                                                                                                                |
| Hiperglucemia, DM | Cabeza y cuello                                               | Inhibidor de mTOR (everolimus)                                                                                                                                                                                                                                                                                |
|                   | Mama                                                          | Inhibidor de mTOR (everolimus)                                                                                                                                                                                                                                                                                |
|                   | Pulmón                                                        | Inhibidor de la tirosincinasa (brigatinib)                                                                                                                                                                                                                                                                    |
|                   | Digestivo (gástrico, intestinal, pancreático, hepático, etc.) | Inhibidor de mTOR (temsirolimus)                                                                                                                                                                                                                                                                              |

|                                             |                                                                                                                                                                     |
|---------------------------------------------|---------------------------------------------------------------------------------------------------------------------------------------------------------------------|
| Ginecológico                                |                                                                                                                                                                     |
| Próstata                                    | Hormonoterapia (agonistas de la LHRH: leuprolida, goserelina, triptorelina, histrelina)                                                                             |
| Sarcoma                                     | Inhibidor de mTOR (temsirolimus)                                                                                                                                    |
| Urológico (riñón, vejiga, testículos, etc.) | Inhibidor de mTOR (everolimus, temsirolimus)                                                                                                                        |
| Melanoma                                    | Inhibidores de la tirosinasa (dabrafenib)                                                                                                                           |
| Neuroendocrinos GIST                        | Inhibidor de mTOR (temsirolimus, everolimus); inhibidores de la tirosinasa (imatinib)                                                                               |
| Leucemia aguda                              | Inhibidor de la tirosinasa (imatinib); asparraginasas; trióxido de arsénico                                                                                         |
| Linfoma                                     | Copanlisib; idealisib; vorinostat                                                                                                                                   |
| LMC                                         | Inhibidores de la tirosinasa (nilotinib, imatinib); busulfán                                                                                                        |
| LLC                                         | Idealisib                                                                                                                                                           |
| MM                                          | Inhibidor del proteosoma (carfilzomib); inmunomoduladores (pomalidomida); anticuerpo monoclonal (daratumumab); inhibidores de la histona deacetilasa (panobinostat) |
| TPH                                         | Inmunosupresores: Inhibidor de mTOR (sirolimus, temsirolimus, everolimus)                                                                                           |

|            | Tratamientos adyuvantes                                 | Corticoides                                            |
|------------|---------------------------------------------------------|--------------------------------------------------------|
| Dislipemia | Cabeza y cuello                                         | Inhibidor de mTOR (everolimus)                         |
|            | Mama                                                    | Inhibidores de la aromatasasa (anastrozol, letrozol).  |
|            | Pulmón                                                  | Lorlatinib                                             |
|            | Digestivo (gástrico, intestinal, pancreático, hepático) | Inhibidor de mTOR (temsirolimus, everolimus)           |
|            | Ginecológico                                            |                                                        |
|            | Próstata                                                | Hormonoterapia                                         |
|            | Sarcoma                                                 |                                                        |
|            | Genitourinario (riñón, vejiga, testículos, etc.)        | Inhibidor de mTOR (everolimus, temsirolimus); mitotane |
|            | Melanoma                                                |                                                        |
|            | Neuroendocrinos GIST                                    | Inhibidor de mTOR (temsirolimus, everolimus)           |
|            | Leucemia aguda                                          | Asparraginasas; pegaspargasa; tretinoína               |
|            | Linfoma                                                 | Copanlisib; idealisib; dubelisib; bexaroteno           |
|            | LMC                                                     | Inhibidor de la tirosinasa anti-BCR-ABL (nilotinib)    |
| LLC        | Idealisib, duvelisib                                    |                                                        |

|                                |                                                  |                                                                                                                                                             |
|--------------------------------|--------------------------------------------------|-------------------------------------------------------------------------------------------------------------------------------------------------------------|
|                                | MM                                               |                                                                                                                                                             |
|                                | Mielofibrosis/Policitemia                        | Ruxolitinib                                                                                                                                                 |
|                                | TPH                                              | Inmunosupresores: inhibidores de la calcineurina (ciclosporina); inhibidor de mTOR (sirolimus, temsirolimus, everolimus); EICH: ruxolitinib                 |
|                                | Tratamientos adyuvantes                          | Corticoides; estimuladores de la eritropoyesis                                                                                                              |
| Eventos trombóticos arteriales | Cabeza y cuello                                  | Inhibidores de la tirosincinasa (sorafenib, lenvatinib, cabozantinib), alquilantes (cisplatino)                                                             |
| Microangiopatía trombótica     | Mama                                             | Antiangiogénicos VEGFi (bevacizumab); antimicrotúbulos (paclitaxel)                                                                                         |
|                                | Pulmón                                           | Antiangiogénicos VEGFi (bevacizumab); alquilantes (cisplatino)                                                                                              |
|                                | Digestivo                                        | Inhibidores de la tirosincinasa (imatinib, sorafenib, lenvatinib, cabozantinib); antiangiogénicos VEGFi (bevacizumab, aflibercept); alquilante (cisplatino) |
|                                | Ginecológico                                     | Inhibidores de la tirosincinasa antiangiogénicos VEGFi (bevacizumab)                                                                                        |
|                                | Próstata                                         |                                                                                                                                                             |
|                                | Sarcoma                                          | Inhibidores de la tirosincinasa (sunitinib, pazopanib, lenvatinib, cabozantinib); antiangiogénicos VEGFi (bevacizumab)                                      |
|                                | Genitourinario (riñón, vejiga, testículos, etc.) | Inhibidores de la tirosincinasa (sunitinib, sorafenib, axitinib, pazopanib); Alquilantes (cisplatino)                                                       |



|            |                         |                                                                                                                                          |
|------------|-------------------------|------------------------------------------------------------------------------------------------------------------------------------------|
|            | Melanoma                |                                                                                                                                          |
|            | Leucemia aguda          | Inhibidor de la tirosincinasa BCR-ABL (dasatinib, ponatinib); L-asparaginasa; Pegaspargasa; busulfán; tretinoína                         |
|            | Linfoma                 | Pegaspargasa                                                                                                                             |
|            | LMC                     | Inhibidor de la tirosincinasa anti-BCR-ABL (dasatinib, ponatinib)                                                                        |
|            | MM                      | Inmunomoduladores (lenalidomida; pomalidomida; talidomida); inhibidor del proteosoma (bortezomib)                                        |
|            | TPH                     | Mantenimiento: inhibidores de la tirosincinasa anti-BCR-ABL (dasatinib, ponatinib)                                                       |
|            | Tratamientos adyuvantes | Corticoides                                                                                                                              |
| Vasculitis | Cabeza y cuello         | ICI pembrolizumab (PD-1); bleomicina; alquilante (cisplatino); antimetabolito (hidroxiurea)                                              |
|            | Mama                    | Gemcitabina, alquilantes (ciclofosfamida)                                                                                                |
|            | Pulmón                  | ICI ipilimumab (CTLA-4); nivolumab (PD-1), pembrolizumab (PD-1), atezolizumab (PD-L1), avelumab (PD-L1), durvalumab (PD-L1); gemcitabina |
|            | Digestivo               | Gemcitabina; alquilante (cisplatino)                                                                                                     |
|            | Ginecológico            | Gemcitabina; melfalán; antimetabolito (hidroxiurea, metotrexato)                                                                         |

|                                                  |                                                                                                                                                                                 |
|--------------------------------------------------|---------------------------------------------------------------------------------------------------------------------------------------------------------------------------------|
| Próstata                                         |                                                                                                                                                                                 |
| Sarcoma                                          |                                                                                                                                                                                 |
| Genitourinario (riñón, vejiga, testículos, etc.) | ICIs(ipilimumab (CTLA-4), nivolumab (PD-1), pembrolizumab (PD-1), atezolizumab (PD-L1), avelumab (PD-L1), durvalumab [PD-L1]); gemcitabina; bleomicina; alquilante (cisplatino) |
| Melanoma                                         | Inhibidores de la tirosinasa BRAF (vemurafenib); ICI ipilimumab (CTLA-4), nivolumab (PD-1), pembrolizumab (PD-1); melfalán, antimetabolito (hidroxiurea)                        |
| Neuroendocrino (GIST)                            |                                                                                                                                                                                 |
| Leucemia aguda                                   | Trióxido de arsénico; pentostatina; antimetabolito (metotrexato); tretinoína                                                                                                    |
| Linfoma                                          | Alquilante (ciclofosfamida, cisplatino), anticuerpo monoclonal anti-CD20 (rituximab), antimetabolito (metotrexato)                                                              |
| LMC                                              |                                                                                                                                                                                 |
| MM                                               | Inhibidor del proteosoma (bortezomib); alquilante (ciclofosfamida, cisplatino); melfalan                                                                                        |
| TPH                                              | EICH: alquilante (ciclofosfamida)                                                                                                                                               |

EICH: enfermedad de injerto contra huésped; GIST: tumores del estroma gastrointestinal; ICI: inhibidores del punto de control inmunitario; LLC: leucemia linfática crónica; LMC: leucemia mieloide crónica; MM: mieloma múltiple; TPH: trasplante de precursores hematopoyéticos.

**Tabla 3 del material adicional**

Principales artículos publicados sobre los factores predictores de mortalidad o eventos cardiovasculares en el paciente con cáncer

| Categoría | Autor, año                         | Tipo de estudio         | Pacientes                         | Seguimiento (años) | Mortalidad CV                                                                                                                             | Evento CV no fatal                                                                                | Enfermedad coronaria | ACV | EVP |
|-----------|------------------------------------|-------------------------|-----------------------------------|--------------------|-------------------------------------------------------------------------------------------------------------------------------------------|---------------------------------------------------------------------------------------------------|----------------------|-----|-----|
| Mixto     | Stoltzfus et al. 2020 <sup>1</sup> | Cohortes                | 7.529.481                         | NR                 | RR = 2,24. Si < 40 años (RR = 43,8), la mayoría en cáncer de mama y linfomas; si ≥ 40, por cáncer de próstata, colorrectal, mama y pulmón |                                                                                                   |                      |     |     |
|           | Sturgeon et al. 2019 <sup>2</sup>  | Cohortes, 28 neoplasias | 3.234.256 (1973-2012). Base SEER  | Hasta 2012/2015    | 11,3% (el 76,3% de causa cardiaca). RR, 2-6; RR 1.º año, 3,93; RR menores de 55 años, 10                                                  |                                                                                                   |                      |     |     |
|           | Armenian et al. 2016 <sup>3</sup>  | Cohortes                | 36.232 con supervivencia ≥ 2 años | Mediana, 4,4       |                                                                                                                                           | RR (CI, ictus, miocardiopatía/IC), 1,7-1,13. Por neoplasias: mieloma múltiple (RR = 1,70), cáncer |                      |     |     |

|                                    |                         |                                   |              |  |  |                                                                                                                                                                           |                                                                                                      |                                                        |  |
|------------------------------------|-------------------------|-----------------------------------|--------------|--|--|---------------------------------------------------------------------------------------------------------------------------------------------------------------------------|------------------------------------------------------------------------------------------------------|--------------------------------------------------------|--|
|                                    |                         |                                   |              |  |  | de pulmón (RR = 1,58), LNH (RR = 1,41), cáncer de ovario (RR = 1,41), cáncer renal (RR = 1,24) y cáncer de mama (RR = 1,13)                                               |                                                                                                      |                                                        |  |
| Strongman et al. 2019 <sup>4</sup> | Cohortes, 20 neoplasias | 108.215 con supervivencia > 1 año | Mediana, 4,5 |  |  | RR de IC/miocardopatía: LNH (RR = 1,94), leucemia (RR = 1,77), MM (RR = 3,29), esofágico (RR = 1,96), de pulmón (RR = 1,82), de riñón (RR = 1,73) y de ovario (RR = 1,59) | Cáncer de esófago (RR = 1,7), pulmón (RR = 1,42), vejiga (RR = 1,25), LNH (RR = 1,3) y MM (RR = 1,9) | Páncreas (RR = 1,84), SNC (RR = 4,42), LNH (RR = 1,48) |  |



|  |  |  |  |  |  |  |  |                                                                                                                                                                                                              |  |  |
|--|--|--|--|--|--|--|--|--------------------------------------------------------------------------------------------------------------------------------------------------------------------------------------------------------------|--|--|
|  |  |  |  |  |  |  |  | delgado<br>(RR =<br>2,88),<br>leucemia<br>(RR =<br>2,84),<br>riñón<br>(RR =<br>2,65),<br>pulmón<br>(RR =<br>2,56) e<br>hígado<br>(RR =<br>2,28). Si<br>metástas<br>is, RR =<br>1,46. A<br>los 10<br>años, RR |  |  |
|--|--|--|--|--|--|--|--|--------------------------------------------------------------------------------------------------------------------------------------------------------------------------------------------------------------|--|--|

|          |                                     |                         |                                                                            |             |                                                                                                               |                                                                                                                         |                             |  |  |
|----------|-------------------------------------|-------------------------|----------------------------------------------------------------------------|-------------|---------------------------------------------------------------------------------------------------------------|-------------------------------------------------------------------------------------------------------------------------|-----------------------------|--|--|
|          |                                     |                         |                                                                            |             |                                                                                                               |                                                                                                                         | = 1,7.<br>LH (RR =<br>2,79) |  |  |
|          | Keegan et al. 2018 <sup>7</sup>     | Cohortes, 14 neoplasias | 79.176 de 15-39 años, con supervivencia > 2 años. Diagnóstico en 1996-2012 | Mediana, 9  |                                                                                                               | 2,8%. Incidencia de ECV a 10 años: SNC, 7,3%; LLA, 6,9%; LAM, 6,8%; LNH, 4,1%. Mayor incidencia con quimioterapia o TPH |                             |  |  |
|          | Zaosky et al. 2017 <sup>8</sup>     | Cohortes                | 1973-2012, Base SEER                                                       | NR          | Cáncer de próstata, mama, testículo, endometrio, laringe y LH con las mayores tasas de mortalidad CV (13-21%) |                                                                                                                         |                             |  |  |
| Linforma | Linschoten et al. 2020 <sup>9</sup> | Cohortes                | 21.211 pacientes (1984-2019)                                               | 10 años     |                                                                                                               | ECV grave, 2,35%; IC, 11,72%                                                                                            |                             |  |  |
|          | Stone et al. 2019 <sup>10</sup>     | Metanálisis             | 32.438 (LH/LNH) con supervivencia > 5 años                                 | Mediana, 10 |                                                                                                               | RR, 2-3 (enfermedad pericárdica, RR = 3,95; pericárdica, RR = 10,7; valvulopatía, RR = 13)                              | NS                          |  |  |



|      |                                          |                                    |                                                        |           |                                                                                                                                                     |                                                                 |  |  |  |
|------|------------------------------------------|------------------------------------|--------------------------------------------------------|-----------|-----------------------------------------------------------------------------------------------------------------------------------------------------|-----------------------------------------------------------------|--|--|--|
|      | Boyne et al. 2018 <sup>11</sup>          | Metanálisis                        | 46.829 LH/14.765 LNH con supervivencia > 5 años        | NR        | LH, RR = 7,31; LNH, R = 5,35; mayor con tratamiento antes de los 21 años                                                                            |                                                                 |  |  |  |
| Mama | Ahmed M. Afifi et al. 2019 <sup>12</sup> | Cohortes                           | 754.270 mujeres, Estados Unidos (2000-2015). Base SEER | > 10 años | 1.º año, 2.972 (10%) mortalidad cardiaca. 1-5 años, 9.499 (11,2%); 5-10 años, 7.905 (15,7%); > 10 años, 3.517 (19,3%); RR = 1,23 (IC95%, 1,09-1,38) |                                                                 |  |  |  |
|      | Buddeke et al. 2019 <sup>13</sup>        | Cohortes                           | 163.881                                                | NR        | Menor riesgo absoluto que en la población general                                                                                                   | Las hospitalizaciones por ECV han aumentado en los últimos años |  |  |  |
|      | Bradshaw et al. 2016 <sup>14</sup>       | Cohortes<br>Supervivencia > 7 años | 1.413 (1996-1997)                                      | 13,5      | 7 años de seguimiento (RR = 1,8) ajustado por edad y FRCV; mortalidad elevada solo si quimioterapia y hormonoterapia                                |                                                                 |  |  |  |
|      | Colzani et al. 2011 <sup>15</sup>        | Cohortes                           | 12.850 mujeres<br>menore de 75 años<br>(1990-2006)     | NR        | El 24% de las mayores de 65 años a los 10 años. En estadios                                                                                         |                                                                 |  |  |  |

|           |                                    |          |                                                                               |           |                                                                                                                        |                                        |                                                             |                                    |  |
|-----------|------------------------------------|----------|-------------------------------------------------------------------------------|-----------|------------------------------------------------------------------------------------------------------------------------|----------------------------------------|-------------------------------------------------------------|------------------------------------|--|
|           |                                    |          |                                                                               |           | precoces, mayor riesgo de muerte CV                                                                                    |                                        |                                                             |                                    |  |
|           | Guo et al. 2020 <sup>16</sup>      | Cohortes | 1.934 mujeres                                                                 | 10 años   |                                                                                                                        |                                        |                                                             |                                    |  |
| Pulmón    | Yoon et al. 2019 <sup>17</sup>     | Cohortes | 20.458 entre 2007-2013 con seguimiento hasta 2016                             | NR        |                                                                                                                        | RR = 1,27; estadios III/IV (RR = 2,01) | RR = 1,26                                                   | RR = 1,22 para ictus isquémico     |  |
| Testículo | Lauritsen et al 2020 <sup>18</sup> | Cohortes | 5.185 pacientes (1984-2007) del registro nacional danés. BEP: 1.819 pacientes | 15,8 años | < 1 año, RR = 7,4; > 10 años, RR = 1,6. Tratamiento con BEP, RR = 1,44. Curva de mortalidad en U (< 1 año y > 10 años) |                                        | IAM en tratados con BEP: < 1 año, RR = 6,3; > 10 años, RR = | Durante tratamiento y hasta 1 año, |  |

|             |                                      |          |                                               |          |                                                                                                                                           |  |                                                     |  |  |
|-------------|--------------------------------------|----------|-----------------------------------------------|----------|-------------------------------------------------------------------------------------------------------------------------------------------|--|-----------------------------------------------------|--|--|
|             |                                      |          |                                               |          |                                                                                                                                           |  | = 1,4. CI<br>o ictus =<br>tras BEP, 6,0<br>RR = 1,3 |  |  |
|             | Fung et al. 2015 <sup>19</sup>       | Cohortes | 15.006 pacientes.<br>Base SEER                | NR       | RR = 1,6. RR en 1 año = 4,9                                                                                                               |  |                                                     |  |  |
| Vesical     | Kong et al. 2019 <sup>20</sup>       | Cohortes | 147.781 con supervivencia > 5 años. Base SEER | NR       | Supervivencia 5-10 años, 11% causa CV frente a 6,9% causa tumoral. Con supervivencia > 10 años, 8,6% causa CV frente a 3,1% causa tumoral |  |                                                     |  |  |
| Endometrio  | Ward et al. 2012 <sup>21</sup>       | Cohortes | 44.145 mujeres.<br>Base SEER (1973-1988)      | NR       | 35,9% muerte CV; RR = 2 comparado con muerte por cáncer. Más riesgo si bajo grado/localizado                                              |  |                                                     |  |  |
| Colo-rectal | Gaitanidis et al. 2019 <sup>22</sup> | Cohortes | 164.719 pacientes.<br>Base SEER               | 18 meses | 2,9% de la cohorte. RR = 11,7                                                                                                             |  |                                                     |  |  |

|            |                                     |                                      |                                |        |                           |                                                                           |                                                    |          |           |
|------------|-------------------------------------|--------------------------------------|--------------------------------|--------|---------------------------|---------------------------------------------------------------------------|----------------------------------------------------|----------|-----------|
| TPH        | Armenian et al. 2011 <sup>23</sup>  | Cohortes                             | 1.244 TPH (1988-2002)          | NR     |                           | RR de IC = 4,5; si antraciclina > 250 mg/m <sup>2</sup> , RR = 9,9        |                                                    |          |           |
|            | Chow et al. 2011 <sup>24</sup>      | Cohortes, con supervivencia > 2 años | 1.491 pacientes (1985-2006)    | NR     | RR = 3,6 (IC95%, 1,7-5,5) | IC o miocardiopatía, RR = 8,8 (5,7-11,8); arritmias, RR = 10,8 (7,4-14,2) | RR = 3,3                                           | RR = 2,1 | RR = 5,0  |
|            | Tichelli et al. 2008 <sup>25</sup>  | Cohortes, con supervivencia > 1 año  | 548 TPH (1990-1995)            | 9 años |                           | 6% (IC95%, 3-10%)                                                         |                                                    |          | 20 (3,6%) |
| Próstatata | Moreira et al. 2017 <sup>26</sup>   | Metanálisis                          | 1.343 tratados con abiraterona | NR     |                           | Cualquier ECV, RR = 1,28; eventos grado ≥ 3 CTCAE, RR = 1,76              |                                                    |          |           |
|            | Iacovelli et al. 2018 <sup>27</sup> | Metanálisis                          | 2.878 tratados con abiraterona | NR     |                           |                                                                           | Cualquier ECV, RR = 1,36; eventos grado ≥ 3 CTCAE, |          |           |

|  |  |  |  |  |  |  |      |  |  |
|--|--|--|--|--|--|--|------|--|--|
|  |  |  |  |  |  |  | RR = |  |  |
|  |  |  |  |  |  |  | 1,84 |  |  |

ACV: accidente cerebrovascular; BEP: bleoblastina-etopósido-cisplatino; CI: cardiopatía isquémica, CV: cardiovascular; ECV: enfermedad cardiovascular; EVP: enfermedad vascular periférica; GIST: tumor del estroma gastrointestinal; IC: insuficiencia cardiaca; IC95%: intervalo de confianza del 95%; LLA: leucemia linfática aguda; LMA: leucemia mieloide aguda; LMC: leucemia mieloide crónica; LNH: linfoma no hodgkiniano; LH: linfoma de Hodgkin; MM: mieloma múltiple; NR: no reportado; RR: riesgo relativo; SNC: sistema nervioso central; SEER: *Surveillance, Epidemiology, and End Results*; TPH: trasplante de precursores hematopoyéticos.

**Tabla 4 del material adicional**

Estudios que relacionan mortalidad cardiaca y eventos cardiovasculares con radioterapia

| Categoría       | Referencia, año                      | Tipo | N, tipo cáncer | Super vivencia (años) | Dosis RT (Gy) | % con RT | Tipo/periodo de administración      | RR (solo reflejado si p < 0,05)                                        | Observaciones                                                                                                 |
|-----------------|--------------------------------------|------|----------------|-----------------------|---------------|----------|-------------------------------------|------------------------------------------------------------------------|---------------------------------------------------------------------------------------------------------------|
| Cáncer infantil | Hancock et al., 1993 <sup>28</sup>   | CR   | 635, LH        | 10                    | 0-45          | 89       | RT campo del manto (82%), 1961-1991 | RR Mtc, 29,4<br>RR IM fatal, 41,5                                      | Todos los fallecidos eran varones con más de 42 Gy                                                            |
|                 | Hudson et al., 1998 <sup>29</sup>    | CR   | 387, LH        | 15                    | 20-44         | 96       | RT campo del manto (68%), 1968-1990 | RR Mtc, 22                                                             | Todos los fallecidos tratados con más de 35 Gy                                                                |
|                 | Mulrooney et al., 2009 <sup>30</sup> | CR   | 14.358, varios | 20                    | 5-35<br>DMC   | 82       | NR, 1970-1986                       | RR IC, 5,9<br>RR IM, 5<br>RR IM, 2,4 si 15-35 Gy<br>RR IM, 3,6 > 35 Gy | Dosis de AC > 250 mg/m <sup>2</sup> se asocia con RR = 5,2 para IC, mujeres y RT > 15 Gy. DMC aumentan riesgo |

|                                      |    |                   |      |                                         |    |                  |                                                                                                |                                                                                                                                    |
|--------------------------------------|----|-------------------|------|-----------------------------------------|----|------------------|------------------------------------------------------------------------------------------------|------------------------------------------------------------------------------------------------------------------------------------|
| Armstrong et al., 2009 <sup>31</sup> | CR | 20.483<br>varios  | > 20 | NR                                      | NR | NR, 1970-1986    | RR Mtc, 7<br>RR Mtc, 3,3, con RT frente a sin RT                                               | RR Mtc, AC sí o no, 3,1<br>Mujeres ↑Mtc                                                                                            |
| Tukenova, 2010 <sup>32</sup>         | CR | 4.122,<br>varios  | 27   | 13%<br>recibier<br>on ><br>15 Gy<br>DMC | 69 | 2D-RT, 1942-1986 | RR Mtc, 5<br>RR Mtc, 12,5 si RT 5-14,9 Gy DMC<br>RR Mtc, 25,1 si RT > 15 Gy DMC                | AC > 360 mg/m <sup>2</sup> , RR Mtc, 4,4<br>↑RR un 60% por cada Gy DMC                                                             |
| Reulen et al., 2010 <sup>33</sup>    | CR | 17.981,<br>varios | 24   | NR                                      | NR | NR, 1941-1991    | RR Mtc, 10,7 los primeros 10 años<br>RR Mtc, 2,3 después<br>RR Mtc, 1,9 con RT frente a sin RT | Mtc se mantiene 2 veces superior a la de población general hasta 45 años tras dx                                                   |
| Haddy et al., 2016 <sup>34</sup>     | CR | 3.162             | 26   | 7,5<br>DMC                              | NR | NR, 1985-1995    | RR EC grado > 3:<br>19-59 con RT 15-30 Gy<br>75-110 con RT > 30 Gy                             | Incidencia de EC grado > 3, 7,4% a los 40 años<br>Exposición a AC y alquilantes a altas dosis aumenta significativamente el riesgo |

|          |                                        |    |           |      |      |     |                                                    |                                                                                                                                                |                                                                                                                           |
|----------|----------------------------------------|----|-----------|------|------|-----|----------------------------------------------------|------------------------------------------------------------------------------------------------------------------------------------------------|---------------------------------------------------------------------------------------------------------------------------|
|          | Chow et al., 2018 <sup>35</sup>        | CR | 13.060    | 19   | NR   | 62  | NR, 1970-1986                                      | Grupo de alto riesgo, RR = 17 de eventos coronarios y 37 de ictus a los 50 años<br>Incidencia acumulada, 19,9 para ambas a los 50 años de edad | Incidencia de CI e ictus del 5% en el grupo de bajo riesgo y el 20% en el grupo de alto riesgo a los 50 años edad         |
| Linfomas | Reinders et al., 1999 <sup>36</sup>    | CR | 258, LH   | 14,2 | 37,2 | 100 | RT campo del manto, 4% con cobalto, 1965-1980      | RR Mt por CI, 5,3<br>RR de evento coronario, 2,7                                                                                               | Más eventos en varones, con FRCV previos y edad más avanzada<br>Riesgo ↑ Mt se mantiene hasta los 25 años del tratamiento |
|          | Heidenreich et al., 2007 <sup>37</sup> | CR | 972, LH   | 10   | > 35 | 100 | NR, 1960-1995                                      | RR Mtc, 4,7<br>RR Mt por IM, 7,5                                                                                                               | 42% de los eventos ocurren en los primeros 10 años tras dx                                                                |
|          | Swerdlow et al., 2010 <sup>38</sup>    | CR | 7.033, LH | 9,9  | NR   | 68  | RT campo del manto o nodular total, 34%, 1967-2000 | RR Mt por IM, 2,5<br>RR Mt por IM, 3,2-8,9 con RT supradiaphragmática                                                                          | Riesgo ↑ de IM se mantiene hasta los 25 años del tratamiento                                                              |



|                                         |                       |    |                  |               |    |                                        |                                                                                                                              |                                                                                                                                                       |
|-----------------------------------------|-----------------------|----|------------------|---------------|----|----------------------------------------|------------------------------------------------------------------------------------------------------------------------------|-------------------------------------------------------------------------------------------------------------------------------------------------------|
| Maraldo et al., 2015 <sup>39</sup>      | EA<br><i>post-hoc</i> | LH | 6.039,9          | 23,3<br>(DMC) | 90 | NR, 1964-1994                          | Incidencia CI, 6% a los 25 años<br>RR = 1,015/Gy en DMC                                                                      | RR = 1,077/cada 50 mg/m <sup>2</sup> dosis de AC<br>Incidencia CI aumenta progresivamente                                                             |
| van Nimwegen et al., 2015 <sup>40</sup> | CR                    | LH | 2.524,20         | 37            | 81 | Solo 2D-RT, varias técnicas, 1965-1995 | RR CI, 2,4 RT sí o no<br>RR CI e IC, 4-6 a los 35 años del tratamiento                                                       | Efectos aditivos de AC, RT y tabaquismo<br>50% tiene algún tipo de ECV a los 40 años del tratamiento<br>Edad tratamiento < 25 años aumenta RR 4,6-7,5 |
| van Nimwegen et al., 2016 <sup>41</sup> | CC                    | LH | 91 frente a 278, | 23,2<br>(DMC) | 66 | RT campo del manto mayoría, 1965-1995  | RR IC, 2,5 con DMC 25-30 Gy y 3,6 si DMC > 31 Gy<br>Incidencia IC tras 25 años en grupo > 31 Gy, 13,3% sin AC y 32,9% con AC | RR IC aumenta 2,83 si se administran AC                                                                                                               |

|      |                                         |    |                        |      |            |     |                                                  |                                                                                          |                                                                   |
|------|-----------------------------------------|----|------------------------|------|------------|-----|--------------------------------------------------|------------------------------------------------------------------------------------------|-------------------------------------------------------------------|
|      | van Nimwegen et al., 2017 <sup>42</sup> | CC | 325 frente a 1.208, LH | 19   | 20,9 (DMC) | 91  | RT campo del manto mayoría, 1965-1995            | RR CI, 2,5 en RT > 20 Gy (DMC) frente a sin RT<br>Aumento RR del 7,4% por cada Gy en DMC | Cualquier FRCV aumenta RR CI 1,5<br>Ejercicio disminuye CI RR 0,5 |
|      | Boyne et al., 2018 <sup>11</sup>        | MT | 61.593, LH y LNH       | 13,8 | NR         | NR  | RT campo del manto 19-100%, 1961-2006            | RR Mtc, 7,3 LH<br>RR Mtc, 5,3 LNH                                                        | En LH dx antes de 21 años, RR Mtc, 13,43                          |
| Mama | Cuzick et al., 1994 <sup>43</sup>       | MT | 7.941, mama            | > 10 | 18-54      | ~50 | Mayoría cobalto y campos tangenciales, 1949-1979 | RR Mtc, 1,62 en RT frente a sin RT                                                       | p NS entre cáncer mama derecha e izquierda                        |
|      | Clarke et al., 2005 <sup>44</sup>       | MT | 42.000, mama           | 15   | NR         | ~50 | NR, 1985-1995                                    | RR Mt circulatoria, 1,25 RT frente a sin RT<br>RR Mtc, 1,27 RT frente a sin RT           | El efecto se mantenía a los 15 años del tratamiento               |

|                                      |    |                                  |      |              |     |                                                                 |                                                                                                                                                                    |                                                                                                                                                                                    |
|--------------------------------------|----|----------------------------------|------|--------------|-----|-----------------------------------------------------------------|--------------------------------------------------------------------------------------------------------------------------------------------------------------------|------------------------------------------------------------------------------------------------------------------------------------------------------------------------------------|
| Darby et al.,<br>2013 <sup>45</sup>  | CC | 963<br>frete a<br>1.208,<br>mama | NA   | 4,9<br>(DMC) | 100 | NR, 1958-2006                                                   | Aumento de tasa de<br>eventos coronarios de<br>7,4% por Gy/DMC                                                                                                     | Relación lineal dosis-incidencia<br>No hay umbral 'seguro'<br>Mujeres con FRCV, riesgo↑; riesgo<br>mama izquierda > derecha<br>Eventos empiezan en los primeros<br>5 años de la RT |
| Boekel et al.,<br>2015 <sup>46</sup> | CR | 70.23<br>0,<br>mama              | 9    | NR           | 66  | Campos<br>tangenciales<br>fotones o<br>electrones,<br>1989-2005 | RR Mtc, 0,87-0,97<br>cáncer mama frente a<br>población general<br>RR eventos CV, 1,23 en<br>RT mama izquierda fente<br>a sin RT y 1,19 frente a<br>RT mama derecha | RR de IC congestiva, 1,35 en<br>regimenes QT antes de 1997 frente<br>a sin QT                                                                                                      |
| Sardar et al.,<br>2016 <sup>47</sup> | MT | 289.1<br>09,<br>mama             | 8-28 | NR           | 100 | Variables, 1954-<br>2002                                        | RR Mtc, 1,12 para RT<br>mama izquierda frente a<br>RR Mtc 1,23 tras 15 años<br>seguimiento                                                                         | RR máximo si cáncer de mama<br>diagnosticado antes de 1982 (RR =<br>1,38)                                                                                                          |

|         |                                            |    |                           |           |            |     |                         |                                                                                   |                                                                                                                                         |
|---------|--------------------------------------------|----|---------------------------|-----------|------------|-----|-------------------------|-----------------------------------------------------------------------------------|-----------------------------------------------------------------------------------------------------------------------------------------|
|         | van den Bogaard et al., 2017 <sup>48</sup> | CP | 910, mama                 | 7,6       | 2,37 (DMC) | 100 | 3D-RT, 2005-2008        | Incidencia de eventos coronarios ↑ 16,5% por cada Gy DMC                          | Score de riesgo para predecir eventos coronarios incluye edad, FRCV, volumen ventricular izquierdo que recibe ≥ 5 Gy                    |
|         | Taylor 2017 <sup>49</sup>                  | MT | 40.781, mama              | 10        | 4,4 (DMC)  | 50  | 2D-RT, 1972-1989        | RR Mtc, 1,3 RT frente a sin RT<br>↑RR/Gy DMC 0,041 (4%)                           | Se estima incremento de Mt cardiaca por RT de 1% en mujeres fumadoras y 0,3% en no fumadoras                                            |
|         | Cheng et al., 2017 <sup>50</sup>           | MT | 1.191.371, mama           | 1-28 años | NR         | NR  | Variables, 1948-2008    | RR Mtc, 1,22 RT izquierda frente a derecha<br>RR Mtc, 1,38 RT frente a sin RT     | RR CI, 1,29 RT izquierda frente a derecha<br>RR CI, 1,3 RT frente a sin RT<br>CI aumenta desde la primera década y Mtc desde la segunda |
| Pulmón* | Hardy et al., 2010 <sup>51</sup>           | CR | 34.209, pulmón, individuo | 3-14 años | NR         | 59  | Varios tipos, 1991-2002 | QT+RT (RR = 2,36) y RT sola (RR = 1,54)<br>aumentan riesgo de disfunción cardiaca | Los eventos de CI aparecen precozmente (mediana, 106 días), y la disfunción cardiaca a los 78 años                                      |

|                                    |             |             |                                     |                |     |                         |  |                                                                                                                   |                                                                                      |
|------------------------------------|-------------|-------------|-------------------------------------|----------------|-----|-------------------------|--|-------------------------------------------------------------------------------------------------------------------|--------------------------------------------------------------------------------------|
|                                    |             |             | uos<br>mayor<br>es de<br>65<br>años |                |     |                         |  | RT pulmón izquierdo (RR = 1,18), QT+RT izquierda (RR = 1,29) y QT+RT ambos pulmones (RR = 1,76) aumentan CI       |                                                                                      |
| Bradley et al., 2015 <sup>52</sup> | EA          | 544, pulmón | ~2 años                             | 60 frente a 74 | 100 | 3D-RT e IMRT, 2007-2011 |  | Porcentaje cardiaco que recibe > 5 Gy fue predictor independiente de supervivencia global                         | Tratamiento con 74 Gy peor Mt global que 60 Gy<br>No se analizan objetivos cardiacos |
| Dess et al., 2017 <sup>53</sup>    | EA Post-hoc | 125         | 51 meses                            | 71 DMC 11      |     | 3D-RT (95%), 2004-2013  |  | Predictores independientes de eventos cardiacos grado > 3 fueron EC preexistente (RR = 2,96) y DMC (RR = 1,07/Gy) | En grupo sin EC previa, RR de eventos cardiacos grado > 3, 1,1/Gy                    |

|        |                                        |    |                        |          |                   |     |                                        |                                                                                                                                             |                                                                                                                        |
|--------|----------------------------------------|----|------------------------|----------|-------------------|-----|----------------------------------------|---------------------------------------------------------------------------------------------------------------------------------------------|------------------------------------------------------------------------------------------------------------------------|
|        | McWilliam et al., 2017 <sup>54</sup>   | CR | 1.101, pulmón          | ~3 años  | 55                | 100 | 3D-RT e IMRT, 2010-2013                | DMC > 6,5 Gy se asocia con peor supervivencia global (RR = 2,1)                                                                             | Irradiación en la base del corazón se asocia con peor supervivencia global                                             |
|        | Atkins, 2019 <sup>55</sup>             | CR | 748, pulmón            | 20 meses | 66 DMC 12,3       | 100 | 3D-RT e IMRT, 1998-2014                | RR de eventos cardiacos mayores, 3,01 con DMC > 10 Gy en pacientes sin CI previa<br>RR eventos cardiacos ↑ 1,05/Gy en ausencia de CI previa | RR de Mt global 1,35 con DMC > 10 Gy en pacientes sin CI previa<br>RR de Mt global ↑ 1,02/Gy en ausencia de CI previa  |
| Varios | Dorresteijn et al., 2002 <sup>56</sup> | CR | 367, laringe, parótida | 7,7 años | 50-66             | 100 | Cobalto y acelerador lineal, 1977-1998 | RR de sufrir ictus isquémico, 5,6<br>Hipertensos y diabéticos<br>tendencia a más eventos                                                    | RR = 10,1 a más de 10 años tras RT, aumenta a lo largo del tiempo<br>RR = 9,8 si RT administradas antes de los 50 años |
|        | Bowers et al., 2006 <sup>57</sup>      | CR | 6.699, niños con       | 17 años  | RT craneal, dosis | 74  | NR, 1970-1986                          | RR ictus, 6,4 en niños con RT cerebral para leucemia                                                                                        | Riesgo ictus es significativo con > 30 Gy en radiación craneal                                                         |

|                                       |    |                                                         |                                                 |                          |             |               |                                                                            |                                                                                            |  |
|---------------------------------------|----|---------------------------------------------------------|-------------------------------------------------|--------------------------|-------------|---------------|----------------------------------------------------------------------------|--------------------------------------------------------------------------------------------|--|
|                                       |    |                                                         | leuce<br>mia y<br>tumor<br>es<br>cerebr<br>ales |                          | media<br>NR |               |                                                                            | RR ictus, 29 en niños<br>con RT para tumores<br>cerebrales                                 |  |
| Mueller et<br>al., 2013 <sup>58</sup> | CR | 14.35<br>8,<br>cáncer<br>infanti<br>l                   | 23<br>años                                      | RT<br>craneal            | 67          | NR, 1970-1986 | RR ictus, 5,9 en niños<br>con RT craneal 30-49 Gy<br>y 11 si dosis > 50 Gy | HTA aumenta riesgo 4 veces                                                                 |  |
| Sun et al.,<br>2013 <sup>59</sup>     | CR | 324,<br>traspl<br>ante<br>proge<br>nitore<br>s<br>hemat | 14,5                                            | RT<br>corpora<br>l total | 76          | NR, 1974-1998 | RR de eventos graves<br>(IM e ictus sobre todo)<br>5,7                     | Con RT corporal total, 3 veces más<br>riesgo de diabetes, cirrosis,<br>insuficiencia renal |  |

|                                                   |    |                                      |                |       |     |                                       |                                                                       |                                                                  |  |
|---------------------------------------------------|----|--------------------------------------|----------------|-------|-----|---------------------------------------|-----------------------------------------------------------------------|------------------------------------------------------------------|--|
|                                                   |    |                                      | opoyé<br>ticos |       |     |                                       |                                                                       |                                                                  |  |
| Chu et al.,<br>2011 <sup>60</sup>                 | CR | 13.390,<br>cuello<br>y<br>cabez<br>a | 5-7<br>años    | NR    | NR  | NR, 2000-2002                         | RR ictus, 1,44 en la<br>cohorte global<br>RR ictus, 1,46 con<br>RT+QT | RR ictus 5,45 en grupo con menos<br>de 40 años                   |  |
| Lin et al.,<br>2012 <sup>61</sup>                 | CR | 676,<br>esófago<br>o                 | 40-82<br>meses | 50    | 100 | 3D-RT frente a<br>IMRT, 1998-<br>2008 | Mtc significativamente<br>peor en grupo 3D-RT                         | RT con técnica 3D-RT mayor dosis<br>cardiaca que IMRT            |  |
| Swisher-<br>McClure et<br>al., 2014 <sup>62</sup> | CR | 8.721,<br>laring<br>e                | 5,3<br>años    | NR    | 82  | EBRT, 1983-<br>2008                   | RR ictus, 1,75 en grupo<br>con RT frente a cirugía                    | A edad más avanzada, mayor<br>riesgo (RR =1,07)                  |  |
| Liao et al.,<br>2018 <sup>63</sup>                | CR | 130,<br>timom<br>a                   | 70<br>meses    | 50-66 | 67  | 3D-RT e IMRT<br>2003-2013             | DMC fue predictor<br>independiente de Mtc                             | Mtc principal causa de Mt no<br>maligna; incidencia de EC, 15,4% |  |



AC: antraciclinas; CC: casos y controles; CI: cardiopatía isquémica; CP: cohorte prospectiva; CR: cohorte retrospectiva; CV: cardiovascular; DMC: dosis media cardiaca; EA: ensayo aleatorizado; EA *post-hoc*: análisis *post-hoc* de 1 o varios ensayos aleatorizados; EBRT: *External Beam Radiation Therapy*; ECV: enfermedad cardiovascular; EC: enfermedad cardiaca; FRCV: factores de riesgo cardiovascular; HTA: hipertensión arterial; IC: insuficiencia cardiaca; IM: infarto miocardio; IMRT: *intensity modulated radiotherapy*; LH: linfoma de Hodgkin; LNH: linfoma no hodgkiniano; MT: metanálisis; Mt: mortalidad; Mtc: mortalidad cardiaca; NR: no reportado; NS: no significativo; QT: quimioterapia; RR: riesgo relativo; RT: radioterapia; S: seguimiento; VI: ventrículo izquierdo.

\*Cáncer de pulmón de célula no pequeña.

**Tabla 5 del material adicional**

Dosis límite de tolerancia de diferentes órganos sanos en función del campo de irradiación

| Órgano sano                                                           | Localización del tumor                                                              | Dosis límite de tolerancia* | Efectos secundarios cardiovasculares                                                                                              |
|-----------------------------------------------------------------------|-------------------------------------------------------------------------------------|-----------------------------|-----------------------------------------------------------------------------------------------------------------------------------|
| Corazón <sup>64</sup>                                                 | Tumor de mama, pulmón, linfomas mediastínicos, timomas, esófago, estómago, hepático | Dosis media, 5 Gy           | Pericarditis, derrame pericárdico, isquemia coronaria, miocardiopatía, miocarditis, lesiones valvulares, arritmias, muerte súbita |
| Carótidas/subclavia <sup>65</sup>                                     | Cabeza y cuello                                                                     | 38-44 Gy                    | Estenosis carotídea, accidente isquémico transitorio e ictus                                                                      |
| Riñones/arterias renales <sup>66</sup>                                | Aparato digestivo, linfomas abdominales                                             | 20 Gy                       | Hipertensión renal, nefritis, estenosis bilateral de arterias renales con nefropatía isquémica                                    |
| Extremidades inferiores (aorta, arterias iliofemorales) <sup>67</sup> | Tumores ginecológicos, sarcomas retroperitoneales                                   | 40-65 Gy                    | Estenosis, trombosis o dilatación aneurismática<br>Claudicación intermitente, isquemia periférica                                 |

|                                      |                                                                                     |          |                                                                  |
|--------------------------------------|-------------------------------------------------------------------------------------|----------|------------------------------------------------------------------|
| Ojos/arteria ocular <sup>68,69</sup> | Tumores oculares y orbitarios, cabeza y cuello (nasofaríngeo, de senos paranasales) | 45-50 Gy | Vasculopatía oclusiva, neovascularización disfuncional y ceguera |
|--------------------------------------|-------------------------------------------------------------------------------------|----------|------------------------------------------------------------------|

\*Dosis límite de tolerancia: dosis a partir de las cuales aumenta el riesgo de toxicidad a la radioterapia.

**Tabla 6 del material adicional**

Tratamientos onco-hematológicos asociados con el desarrollo y la exacerbación de la hipertensión arterial<sup>70-75</sup>

| Agentes quimioterápicos                                                                                                                                                                                                                                                                                                                                                             | Mecanismos de elevación de la presión arterial                                                                                                                                                                                                                                                   | Incidencia de HTA (%)                                                                                           |
|-------------------------------------------------------------------------------------------------------------------------------------------------------------------------------------------------------------------------------------------------------------------------------------------------------------------------------------------------------------------------------------|--------------------------------------------------------------------------------------------------------------------------------------------------------------------------------------------------------------------------------------------------------------------------------------------------|-----------------------------------------------------------------------------------------------------------------|
| <p><b>Antiangiogénicos</b></p> <p><i>Anticuerpo monoclonal humanizado tipo anti-VEGF</i></p> <ul style="list-style-type: none"> <li>• Bevacizumab</li> </ul> <p><i>Inhibidores de la tirosincinasa</i></p> <ul style="list-style-type: none"> <li>• Sorafenib</li> <li>• Sunitinib</li> <li>• Axitinib</li> <li>• Vandetanib</li> <li>• Regorafenib</li> <li>• Ibrutinib</li> </ul> | <p>Aumento de la resistencia vascular</p> <ul style="list-style-type: none"> <li>• Reducción de la producción de óxido nítrico</li> <li>• Reducción de angiogénesis</li> </ul> <p>Afección de natriuresis</p> <p>Vasoconstricción mediada por endotelina 1</p> <p>Microangiopatía trombótica</p> | <p>20,5-27,1</p> <p>19,3-26,9</p> <p>18,7-24,8</p> <p>30,9-50,2</p> <p>18,1-30,2</p> <p>30,8-59,0</p> <p>78</p> |
| <p><b>Inhibidores del proteosoma</b></p>                                                                                                                                                                                                                                                                                                                                            | <p>Microangiopatía trombótica (raro)</p>                                                                                                                                                                                                                                                         |                                                                                                                 |

|                                                                                                                                                       |                                                                            |                               |
|-------------------------------------------------------------------------------------------------------------------------------------------------------|----------------------------------------------------------------------------|-------------------------------|
| <ul style="list-style-type: none"> <li>• Bortezomib</li> <li>• Carfilzomib</li> </ul>                                                                 | Reducción de la respuesta vasodilatadora de la acetilcolina                | 8<br>15-42                    |
| <b>Agentes alquilantes</b> <ul style="list-style-type: none"> <li>• Ciclofosfamida + busulfano</li> <li>• Ifosfamida</li> <li>• Cisplatino</li> </ul> | Daño vascular endotelial<br>Nefrotoxicidad<br>Nefrotoxicidad               | 25-36<br>$\leq 1$<br>$\leq 1$ |
| <b>Antimicrotúbulos</b> <ul style="list-style-type: none"> <li>• Vinblastina</li> </ul>                                                               | Daño vascular endotelial ( <i>in vitro</i> )                               | ND                            |
| <b>Antimetabolitos</b> <ul style="list-style-type: none"> <li>• Gemcitabina</li> </ul>                                                                | Microangiopatía trombótica<br>Daño vascular endotelial ( <i>in vitro</i> ) | 10-29                         |
| <b>Radiación</b> <ul style="list-style-type: none"> <li>• Radiación abdominal</li> <li>• Radiación en cabeza y cuello</li> </ul>                      | Estenosis de arterias renales<br>Fallo en funcionamiento de barorreflejos  | ND                            |
| <b>Tratamientos adyuvantes</b>                                                                                                                        | Aumento de masa eritrocitaria                                              | 20-30                         |

|                                                                                                                                                                  |                                                                                                                                                                                                                                                                                   |                                        |
|------------------------------------------------------------------------------------------------------------------------------------------------------------------|-----------------------------------------------------------------------------------------------------------------------------------------------------------------------------------------------------------------------------------------------------------------------------------|----------------------------------------|
| <ul style="list-style-type: none"> <li>• Agentes estimuladores de la eritropoyesis</li> <li>• Antiinflamatorios no esteroideos</li> <li>• Corticoides</li> </ul> | <p>Alteración de la respuesta a vasodilatadores y vasoconstrictores endógenos</p> <p>Afección de natriuresis por reducción de la síntesis de prostaglandinas</p> <p>Retención de sodio por estimulación del receptor de mineralocorticoides</p>                                   | <p>10,3-23,2</p> <p>20</p>             |
| <p><b>Inmunosupresores</b></p> <ul style="list-style-type: none"> <li>• Ciclosporina</li> <li>• Tacrolimus</li> <li>• MMF</li> </ul>                             | <p>Aumento de la actividad simpática</p> <p>Aumento de reabsorción en túbulo proximal</p> <p>Alteración de síntesis de prostaglandinas vasodilatadoras</p> <p>Cambios en el SRAA y daño vascular directo</p> <p>Cambios en ritmo circadiano, ausencia de caída de PA nocturna</p> | <p>11-80</p> <p>30-80</p> <p>20-80</p> |

MMF: micofenolato mofetilo; ND: no disponible; SRAA: sistema renina-angiotensina-aldosterona; VEGF: factor de crecimiento del endotelio vascular.

**Tabla 7 del material adicional**

Fármacos hipolipemiantes: interacciones con tratamientos onco-hematológicos y datos específicos en el paciente oncológico

| Hipolipemiante                               | Mecanismo de interacción                  | Fármacos que evitar                                                                                                                                                                                                                                                                                                                            | Efecto secundario, vigilancia y actitud ante el paciente con combinación de estos fármacos                                                                                                                      | Ventajas                                                                                                                                                           |
|----------------------------------------------|-------------------------------------------|------------------------------------------------------------------------------------------------------------------------------------------------------------------------------------------------------------------------------------------------------------------------------------------------------------------------------------------------|-----------------------------------------------------------------------------------------------------------------------------------------------------------------------------------------------------------------|--------------------------------------------------------------------------------------------------------------------------------------------------------------------|
| <i>Estatinas</i>                             |                                           |                                                                                                                                                                                                                                                                                                                                                |                                                                                                                                                                                                                 |                                                                                                                                                                    |
| Simvastatina<br>Atorvastatina<br>Lovastatina | Inhibición del citocromo P4503A4 o CYP3A4 | Fármacos inhibidores del citocromo P5403A4 o CYP3A4: bexaroteno, busulfano, cisplatino, ciclofosfamida, citarabina, dexametasona, docetaxel, doxorubicina, erlotinib, etopósido, exemestano, flutamida, fulvestrant, gefitinib, genoxal, ifosmamida, imatinib, irinotecam, letrozol, medroxiprogesterona, mitoxantrona, placitaxel, sorafenib, | <ul style="list-style-type: none"> <li>• Aumento del riesgo de miopatía, rabdomiolisis y toxicidad hepática por estatinas</li> <li>• Vigilar cifras de CK y enzimas hepáticas y clínica del paciente</li> </ul> | Simvastatina: baja biodisponibilidad, potencia media<br>Atorvastatina: alta potencia, biodisponibilidad baja<br>Lovastatina: baja potencia, baja biodisponibilidad |

|                                                |                              |                                                                                                                                                                                                                                                        |                                   |                                                                                                                       |
|------------------------------------------------|------------------------------|--------------------------------------------------------------------------------------------------------------------------------------------------------------------------------------------------------------------------------------------------------|-----------------------------------|-----------------------------------------------------------------------------------------------------------------------|
|                                                |                              | sunitinib, tamoxifeno, targretina, tenipósido, topotecán, toremifeno, tetrinoína, vinblastina, vincristina, vindesina, vinorelbina • No se afectan por fármacos inhibidores de CYP3A4 • Estatinas ideales para pacientes en tratamiento quimioterápico | • Individualizar riesgo/beneficio |                                                                                                                       |
| Pitavastatina<br>Rosuvastatina<br>Pravastatina | No se metabolizan por CYP3A4 |                                                                                                                                                                                                                                                        |                                   | Pitavastatina: potencia media, alta<br>biodisponibilidad                                                              |
|                                                |                              |                                                                                                                                                                                                                                                        |                                   | Rosuvastatina: alta potencia,<br>biodisponibilidad intermedia (estatina de elección para pacientes con quimioterapia) |
|                                                |                              |                                                                                                                                                                                                                                                        |                                   | Pravastatina: baja potencia,                                                                                          |



|                 |                      |                                                         |                                                                                                                                                                                                                                                            |                                                           |
|-----------------|----------------------|---------------------------------------------------------|------------------------------------------------------------------------------------------------------------------------------------------------------------------------------------------------------------------------------------------------------------|-----------------------------------------------------------|
|                 |                      |                                                         |                                                                                                                                                                                                                                                            | biodisponibilidad intermedia                              |
| Fluvastatina    | Inhibición de CYP2C9 | Fármacos inhibidores de CYP29C: toremifeno y tretinoína | <ul style="list-style-type: none"> <li>• Aumento del riesgo de miopatía, rabdomiolisis y toxicidad hepática por estatinas</li> <li>• Vigilar cifras de CK y enzimas hepáticas y clínica del paciente</li> <li>• Deben valorarse otras estatinas</li> </ul> | Fluvastatina: baja potencia, biodisponibilidad intermedia |
| <i>Fibratos</i> |                      |                                                         |                                                                                                                                                                                                                                                            |                                                           |
| Fenofibrato     |                      |                                                         |                                                                                                                                                                                                                                                            | Fenofibrato: de elección para pacientes oncológicos       |

|                                                  |                               |                        |                                              |                                                            |
|--------------------------------------------------|-------------------------------|------------------------|----------------------------------------------|------------------------------------------------------------|
| Genfibrocilo                                     | Sustrato de isoenzimas UGT1A1 | Irinotecam y etopósido | Aumento plasmático de irinotecam y etopósido | Genfibrucilo: utilizar otro fibrato en caso de interacción |
| <i>Inhibidores de la absorción de colesterol</i> |                               |                        |                                              |                                                            |
| Ezetimiba                                        | No se han descrito            |                        | No se han descrito                           | Ezetimiba: fármaco seguro                                  |

**Tabla 8 del material adicional**

Tabla de causas de mortalidad a 5 años en supervivientes de cáncer infantil (modificada de *The Childhood Cancer Survivor Study*<sup>76</sup>)

| Factor de riesgo independiente | Riesgo relativo mortalidad atribuible a causas cardiacas |         | Observaciones                                                                                                                                                                                                                                                                                                                                                                                                                          |
|--------------------------------|----------------------------------------------------------|---------|----------------------------------------------------------------------------------------------------------------------------------------------------------------------------------------------------------------------------------------------------------------------------------------------------------------------------------------------------------------------------------------------------------------------------------------|
|                                | RR (IC95%)                                               | p       |                                                                                                                                                                                                                                                                                                                                                                                                                                        |
| <i>Radiación</i>               |                                                          |         | Efecto dependiente de la dosis y acumulativo. Con dosis > 35-40 Gy, riesgo importante<br><br>Relacionada con FR clásicos: HTA, dislipemia, DM2<br><br>Neoplasias susceptibles de irradiación torácica o abdominal alta:<br><ul style="list-style-type: none"> <li>• Linfoma de Hodgkin</li> <li>• Nefroblastoma</li> <li>• Neuroblastoma</li> <li>• Sarcoma de Ewing con afección costal u otros sarcomas de partes blandas</li> </ul> |
| Sí                             | 3,3 (2,0-5,5)                                            | < 0,001 |                                                                                                                                                                                                                                                                                                                                                                                                                                        |
| No                             | 1                                                        |         |                                                                                                                                                                                                                                                                                                                                                                                                                                        |

|                                       |               |                                                |                                                                                                                                                                                                                                                                                                                                                                                                                      |
|---------------------------------------|---------------|------------------------------------------------|----------------------------------------------------------------------------------------------------------------------------------------------------------------------------------------------------------------------------------------------------------------------------------------------------------------------------------------------------------------------------------------------------------------------|
|                                       |               |                                                | <ul style="list-style-type: none"> <li>• Tumores del sistema nervioso central que reciben irradiación cráneo-espinal</li> <li>• Metástasis pulmonares</li> </ul>                                                                                                                                                                                                                                                     |
| <i>Antraciclínas</i>                  |               |                                                | Factores de riesgo de cardiotoxicidad inducida por antraciclínas <sup>77</sup> : <ul style="list-style-type: none"> <li>• Dosis total acumulada</li> <li>• Edad &lt; 5 años</li> <li>• Mayor tiempo transcurrido desde la terapia</li> <li>• Sexo femenino</li> <li>• Tratamiento concomitante con radioterapia</li> <li>• Exposición concomitante a ciclofosfamida, bleomicina, vincristina, trastuzumab</li> </ul> |
| Sin exposición                        | 1             |                                                |                                                                                                                                                                                                                                                                                                                                                                                                                      |
| 1-100 mg/m <sup>2</sup>               | 2,5 (0,7-9,2) | 0,155                                          |                                                                                                                                                                                                                                                                                                                                                                                                                      |
| 101-250 mg/m <sup>2</sup>             | 2,3 (0,9-6)   | 0,093                                          |                                                                                                                                                                                                                                                                                                                                                                                                                      |
| 251-400 mg/m <sup>2</sup>             | 2,2 (1,3-4)   | 0,006                                          |                                                                                                                                                                                                                                                                                                                                                                                                                      |
| > 401 mg/m <sup>2</sup>               | 3,1 (1,6-5,8) | < 0,001                                        |                                                                                                                                                                                                                                                                                                                                                                                                                      |
| <i>Agentes alquilantes, score</i>     |               |                                                |                                                                                                                                                                                                                                                                                                                                                                                                                      |
| Sin exposición                        | 1             |                                                |                                                                                                                                                                                                                                                                                                                                                                                                                      |
| 1-2                                   | 0,6 (0,3-1,2) | 0,170                                          |                                                                                                                                                                                                                                                                                                                                                                                                                      |
| 3-4                                   | 0,6 (0,3-1,4) | 0,278                                          |                                                                                                                                                                                                                                                                                                                                                                                                                      |
| ≥ 5                                   | 1,7 (1-3)     | 0,053                                          |                                                                                                                                                                                                                                                                                                                                                                                                                      |
| Nuevas terapias en pediatría (p. ej., |               | Morbilidad/mortalidad cardiaca SCI desconocida |                                                                                                                                                                                                                                                                                                                                                                                                                      |

|                                                      |                                                                      |  |                                                                                                                                                                                                                                                                                                                                                                                         |
|------------------------------------------------------|----------------------------------------------------------------------|--|-----------------------------------------------------------------------------------------------------------------------------------------------------------------------------------------------------------------------------------------------------------------------------------------------------------------------------------------------------------------------------------------|
| inhibidores de la tirosincinasa)                     |                                                                      |  |                                                                                                                                                                                                                                                                                                                                                                                         |
| <b>Causa específica-neoplasia primaria</b>           | <b>Tasa de mortalidad estandarizada por causas cardiacas (IC95%)</b> |  | <b>Observaciones</b>                                                                                                                                                                                                                                                                                                                                                                    |
| Leucemia aguda linfoblática                          | 4,2 (2,3-6,9)                                                        |  | Neoplasias más frecuentes en pediatría en las que es común el uso de antracicinas: leucemias agudas, linfoblásticas o mieloblásticas; linfomas de Hodgkin y no hodgkinianos; sarcoma óseo y sarcomas de la familia de Ewing; sarcomas de partes blandas; nefroblastoma (tumor de Wilms); hepatoblastoma; neuroblastoma, y excepcionalmente algunos tumores del sistema nervioso central |
| Leucemia aguda mieloblástica                         | 5,0 (0,6-18,1)                                                       |  |                                                                                                                                                                                                                                                                                                                                                                                         |
| Otras leucemias                                      | 5,4 (0,6-19,4)                                                       |  |                                                                                                                                                                                                                                                                                                                                                                                         |
| Astrocitomas                                         | 6,2 (3-11,4)                                                         |  |                                                                                                                                                                                                                                                                                                                                                                                         |
| Meduloblastoma, tumores neuroectodérmicos primitivos | 0 (0-10,8)                                                           |  |                                                                                                                                                                                                                                                                                                                                                                                         |
| Otros tumores del SNC                                | 0 (0,0-8,6)                                                          |  |                                                                                                                                                                                                                                                                                                                                                                                         |
| Linfoma de Hodgkin                                   | 11,9 (9,1-15,3)                                                      |  |                                                                                                                                                                                                                                                                                                                                                                                         |
| Linfoma no hodgkiniano                               | 6,5 (3,5-11,1)                                                       |  |                                                                                                                                                                                                                                                                                                                                                                                         |
| Tumores renales                                      | 12,7 (6,3-22,8)                                                      |  |                                                                                                                                                                                                                                                                                                                                                                                         |

|                         |               |  |  |
|-------------------------|---------------|--|--|
| Neuroblastoma           | 5 (1,1-14,6)  |  |  |
| Sarcoma tejidos blandos | 4 (1,8-7,6)   |  |  |
| Sarcoma de Ewin         | 12 (5,2-23,6) |  |  |
| Osteosarcoma            | 3,9 (1,6-8,1) |  |  |
| Otros tumores óseos     | 0 (0-16,8)    |  |  |

**Tabla 9 del material adicional**

Principales registros sobre factores de riesgo cardiovascular y/o mortalidad tardía (más de 5 años) en supervivientes de cáncer infantil

| Referencia                   | Año  | Registro                                                   | Estudio                                                                                                                                                                                                                           | Resultados - Conclusiones                                                                                                                                                                                                                    |
|------------------------------|------|------------------------------------------------------------|-----------------------------------------------------------------------------------------------------------------------------------------------------------------------------------------------------------------------------------|----------------------------------------------------------------------------------------------------------------------------------------------------------------------------------------------------------------------------------------------|
| Lapirow et al. <sup>78</sup> | 2019 | Australian Cardio-Oncology Registry (ACOR) (12 hospitales) | Definición del registro y creación de un biobanco. Multicéntrico, prospectivo. Inclusión de pacientes entre 0-35 años con cáncer y exposición a fármacos cardiotoxicos                                                            | Pendiente la publicación de resultados                                                                                                                                                                                                       |
| Khanna et al. <sup>79</sup>  | 2019 | Pediatric Oncology Group of Ontario Networked Information  | 7.289 supervivientes de cáncer infantil, diagnosticados antes de los 18 años y tratados en centros de cáncer pediátrico entre 1987 y 2010. Mediana de seguimiento, 10 años. Cada paciente fue emparejado con 5 sujetos sin cáncer | Aumento significativo en el riesgo CVS, 3,2 eventos cardiacos/1.000, en comparación con los sujetos sin cáncer (0,9/1.000), a los 10 y 15 años. Los factores de riesgo fueron antraciclina > 250 mg/m <sup>2</sup> , diabetes e hipertensión |

|                               |      | System<br>(POGONIS)                       |                                                                                                                     |                                                                                                                                                                                                                                  |
|-------------------------------|------|-------------------------------------------|---------------------------------------------------------------------------------------------------------------------|----------------------------------------------------------------------------------------------------------------------------------------------------------------------------------------------------------------------------------|
| Hau et al. <sup>80</sup>      | 2019 | Swiss Childhood Cancer Survivor Study     | Cuestionario a los 511 pacientes sobrevivientes de LLA diagnosticados entre 1976 y 2005 comparando con 709 hermanos | Todos los sobrevivientes tuvieron un mayor riesgo CVS: el 14% de los 511 sobrevivientes en comparación con el 8% de los hermanos. La IC fue más frecuente en el tratamiento combinado cardiotoxico (antraciclina y radioterapia) |
| Bagnasco et al. <sup>81</sup> | 2019 | Italian childhood cancer survivors (CCSs) | 12.214 pacientes supervivientes más de 5 años por diferentes tumores                                                | En 1.113 (9,1%) pacientes, la recurrencia del cáncer original representó la mayoría de las muertes (56%); la enfermedad cardiovascular es la tercera causa de muerte relacionada con fármacos cardiotoxicos                      |
| Fidler et al. <sup>82</sup>   | 2017 | British Childhood                         | 34.489 pacientes tras cáncer infantil diagnosticados entre 1940- 2006 y con seguimiento hasta febrero de 2014       | Muertes por eventos cardiacos, 181 (3,2 veces más de lo esperable), sobre todo de tratados en 1980-1989 (28,9                                                                                                                    |



|                                |      |                                                                          |                                                                                               |                                                                                                                                                                                                                                                |
|--------------------------------|------|--------------------------------------------------------------------------|-----------------------------------------------------------------------------------------------|------------------------------------------------------------------------------------------------------------------------------------------------------------------------------------------------------------------------------------------------|
|                                |      | Cancer Survivor Study                                                    |                                                                                               | <p>veces más riesgo, introducción de la antraciclina)</p> <p>En mayores de 60 años la mortalidad es superior a de la población general (37%) (un 60% relacionada con causas cardiacas) frente al 31%. Necesidad de estrategias preventivas</p> |
| Feijen et al. <sup>83</sup>    | 2016 | PanCareSurFup (PCSF) (registros de 8 países europeos, actualmente 1.228) | 59.915 casos de supervivientes más de 5 años tras cáncer infantil diagnosticados en 1940-2009 | Detección de 750 eventos cardiacos en el seguimiento (54% IC, 12% isquemia, 4% pericarditis, 12% enfermedad valvular y 18% arritmias); pendiente la identificación de los factores de riesgo                                                   |
| Armstrong et al. <sup>84</sup> | 2013 | Childhood Cancer Survivor Study (26                                      | Inclusión de 10.724 pacientes; seguimiento cardiaco completo de 7.247 (media de edad,         | Incidencias acumuladas de enfermedad coronaria, IC, enfermedad valvular y arritmia a los 45 años del 5,3, el 4,8, el                                                                                                                           |

|  |  |                          |                                                       |                                                                                                                                           |
|--|--|--------------------------|-------------------------------------------------------|-------------------------------------------------------------------------------------------------------------------------------------------|
|  |  | centros USA y<br>Canada) | 33,7 años) y un grupo de control de 3.159<br>hermanos | 1,5 y el 1,3% respectivamente. La<br>hipertensión potencia el riesgo asociado<br>con el tratamiento del cáncer y los<br>eventos cardiacos |
|--|--|--------------------------|-------------------------------------------------------|-------------------------------------------------------------------------------------------------------------------------------------------|

## **BIBLIOGRAFÍA DEL MATERIAL ADICIONAL**

1. Stoltzfus KC, Zhang Y, Sturgeon K, et al. Fatal heart disease among cancer patients. *Nat Comm.* 2020;11:2011.
2. Sturgeon KM, Deng L, Bluethmann SM, et al. A population-based study of cardiovascular disease mortality risk in US cancer patients. *Eur Heart J.* 2019;40:3889-3897.
3. Armenian SH, Xu L, Ky B, et al. Cardiovascular disease among survivors of adult-onset cancer: a community-based retrospective cohort study. *J Clin Oncol.* 2016;34:1122-1130.
4. Strongman H, Gadd S, Matthews A, et al. Medium and long-term risks of specific cardiovascular diseases in survivors of 20 adult cancers: a population-based cohort study using multiple linked UK electronic health records databases. *Lancet.* 2019;394:1041-54.
5. Schoormans D, Vissers PAJ, van Herk-Sukel MPP, et al. Incidence of cardiovascular disease up to 13 year after cancer diagnosis: A matched cohort study among 32 757 cancer survivors. *Cancer Med.* 2018;7:4952-4963.
6. Zoller B, Ji J, Sundquist J, Sundquist K. Risk of coronary heart disease in patients with cancer: a nationwide follow-up study from Sweden. *Eur J Cancer.* 2012;48:121-128.
7. Keegan THM, Kushi LH, Li Q, et al. Cardiovascular disease incidence in adolescent and young adult cancer survivors: a retrospective cohort study. *J Cancer.* 2018;12:388-397.
8. Zaorsky NG, Churilla TM, Egleston BL, et al. Causes of death among cancer patients. *Ann Oncol.* 2017;28:400-407.
9. Linschoten M, Kamphuis JAM, van Rhenen A, et al. Cardiovascular adverse events in patients with non-Hodgkin lymphoma treated with first-line cyclophosphamide, doxorubicin, vincristine, and prednisone (CHOP) or CHOP with rituximab (R-CHOP): a systematic review and meta-analysis. *Lancet Haematology.* 2020;7:e295-e308.

10. Stone CR, Mickle AT, Boyne DJ, et al. Treatment for lymphoma and late cardiovascular disease risk: A systematic review and meta-analysis. *Health Sci Rep.* 2019;2:e135.
11. Boyne DJ, Mickle AT, Brenner DR, et al. Long-term risk of cardiovascular mortality in lymphoma survivors: A systematic review and meta-analysis. *Cancer Med.* 2018;7:4801-4813.
12. Afifi AM, Saad AM, Al-Husseini MJ, Elmehrath AO, Northfelt DW, Sonbol MB. Causes of death after breast cancer diagnosis: A US population-based analysis. *Cancer.* 2020;126:1559-1567.
13. Buddeke J, Gernaat SAM, Bots ML, et al. Trends in the risk of cardiovascular disease in women with breast cancer in a Dutch nationwide cohort study. *BMJ open.* 2019;9:e022664.
14. Bradshaw PT, Stevens J, Khankari N, Teitelbaum SL, Neugut AI, Gammon MD. Cardiovascular disease mortality among breast cancer survivors. *Epidemiology.* 2016;27:6-13.
15. Colzani E, Liljegren A, Johansson AL, et al. Prognosis of patients with breast cancer: causes of death and effects of time since diagnosis, age, and tumor characteristics. *J Clin Oncol.* 2011;29:4014-4021.
16. Guo A, Zhang KW, Reynolds K, Foraker RE. Coronary heart disease and mortality following a breast cancer diagnosis. *BMC Med Inform Decis Mak.* 2020;20:88.
17. Yoon DW, Shin DW, Cho JH, et al. Increased risk of coronary heart disease and stroke in lung cancer survivors: A Korean nationwide study of 20,458 patients. *Lung Cancer.* 2019;136:115-121.
18. Lauritsen J, Hansen MK, Bandak M, et al. Cardiovascular risk factors and disease after male germ cell cancer. *J Clin Oncol.* 2020;38:584-592.
19. Fung C, Fossa SD, Milano MT, Sahasrabudhe DM, Peterson DR, Travis LB. Cardiovascular disease mortality after chemotherapy or surgery for testicular nonseminoma: a population-based study. *J Clin Oncol.* 2015;33:3105-3115.

20. Kong J, Diao X, Diao F, et al. Causes of death in long-term bladder cancer survivors: A population-based study. *Asia-Pacific J Clin Oncol*. 2019;15:e167-e174.
21. Ward KK, Shah NR, Saenz CC, McHale MT, Alvarez EA, Plaxe SC. Cardiovascular disease is the leading cause of death among endometrial cancer patients. *Gynecol Oncol*. 2012;126:176-179.
22. Gaitanidis A, Spathakis M, Tsalikidis C, Alevizakos M, Tsaroucha A, Pitiakoudis M. Risk factors for cardiovascular mortality in patients with colorectal cancer: a population-based study. *Int J Clin Oncol*. 2019;24:501-507.
23. Armenian SH, Sun CL, Shannon T, et al. Incidence and predictors of congestive heart failure after autologous hematopoietic cell transplantation. *Blood*. 2011;118:6023-6029.
24. Chow EJ, Mueller BA, Baker KS, et al. Cardiovascular hospitalizations and mortality among recipients of hematopoietic stem cell transplantation. *Ann Intern Med*. 2011;155:21-32.
25. Tichelli A, Passweg J, Wojcik D, et al. Late cardiovascular events after allogeneic hematopoietic stem cell transplantation: a retrospective multicenter study of the Late Effects Working Party of the European Group for Blood and Marrow Transplantation. *Haematologica*. 2008;93:1203-1210.
26. Moreira RB, Debiasi M, Francini E, et al. Differential side effects profile in patients with mCRPC treated with abiraterone or enzalutamide: a meta-analysis of randomized controlled trials. *Oncotarget*. 2017;8:84572-84578.
27. Iacovelli R, Ciccarese C, Bria E, et al. The cardiovascular toxicity of abiraterone and enzalutamide in prostate cancer. *Clin Genitourin Cancer*. 2018;16:e645-e653.
28. Hancock SL, Donaldson SS, Hoppe RT. Cardiac disease following treatment of Hodgkin's disease in children and adolescents. *J Clin Oncol*. 1993;11:1208-1215.
29. Hudson MM, Poquette CA, Lee J, et al. Increased mortality after successful treatment for Hodgkin's disease. *J Clin Oncol*. 1998;16:3592-3600.
30. Mulrooney DA, Yeazel MW, Kawashima T, et al. Cardiac outcomes in a cohort of adult survivors of childhood and adolescent cancer: retrospective analysis of the Childhood Cancer Survivor Study cohort. *BMJ*. 2009;339:b4606.

31. Armstrong GT, Liu Q, Yasui Y, et al. Late mortality among 5-year survivors of childhood cancer: a summary from the Childhood Cancer Survivor Study. *J Clin Oncol.* 2009;27:2328-2338.
32. Tukenova M, Guibout C, Oberlin O, et al. Role of cancer treatment in long-term overall and cardiovascular mortality after childhood cancer. *J Clin Oncol.* 2010;28:1308-1315.
33. Reulen RC, Winter DL, Frobisher C, et al. Long-term cause-specific mortality among survivors of childhood cancer. *JAMA.* 2010;304:172-179.
34. Haddy N, Diallo S, El-Fayech C, et al. Cardiac diseases following childhood cancer treatment: cohort study. *Circulation* 2016;133:31-38.
35. Chow EJ, Chen Y, Hudson MM, et al. Prediction of ischemic heart disease and stroke in survivors of childhood cancer. *J Clin Oncol.* 2018;36:44-52.
36. Reinders JG, Heijmen BJ, Olofsen-van Acht MJ, van Putten WL, Levendag PC. Ischemic heart disease after mantlefield irradiation for Hodgkin's disease in long-term follow-up. *Radiother Oncol.* 1999;51:35-42.
37. Heidenreich PA, Schnittger I, Strauss HW, et al. Screening for coronary artery disease after mediastinal irradiation for Hodgkin's disease. *J Clin Oncol.* 2007;25:43-49.
38. Swerdlow AJ, Higgins CD, Smith P, et al. Myocardial infarction mortality risk after treatment for Hodgkin disease: a collaborative British cohort study. *J Nat Cancer Inst.* 2007;99:206-14.
39. Maraldo MV, Giusti F, Vogelius IR, et al. Cardiovascular disease after treatment for Hodgkin's lymphoma: an analysis of nine collaborative EORTC-LYSA trials. *Lancet Haematology.* 2015;2:e492-502.
40. van Nimwegen FA, Schaapveld M, Janus CP, et al. Cardiovascular disease after Hodgkin lymphoma treatment: 40-year disease risk. *JAMA Intern Med.* 2015;175:1007-1017.
41. van Nimwegen FA, Schaapveld M, Cutter DJ, et al. Radiation dose-response relationship for risk of coronary heart disease in survivors of Hodgkin lymphoma. *J Clin Oncol.* 2016;34:235-243.

42. van Nimwegen FA, Ntentas G, Darby SC, et al. Risk of heart failure in survivors of Hodgkin lymphoma: effects of cardiac exposure to radiation and anthracyclines. *Blood*. 2017;129:2257-2265.
43. Cuzick J, Stewart H, Rutqvist L, et al. Cause-specific mortality in long-term survivors of breast cancer who participated in trials of radiotherapy. *J Clin Oncol*. 1994;12:447-453.
44. Clarke M, Collins R, Darby S, et al. Effects of radiotherapy and of differences in the extent of surgery for early breast cancer on local recurrence and 15-year survival: an overview of the randomised trials. *Lancet*. 2005;366:2087-2106.
45. Darby SC, Ewertz M, McGale P, et al. Risk of ischemic heart disease in women after radiotherapy for breast cancer. *N Engl J Med*. 2013;368:987-998.
46. Boekel NB, Schaapveld M, Gietema JA, et al. Cardiovascular disease risk in a large, population-based cohort of breast cancer survivors. *Int J Rad Oncol Biol Phys*. 2016;94:1061-1072.
47. Sardar P, Kundu A, Chatterjee S, et al. Long-term cardiovascular mortality after radiotherapy for breast cancer: A systematic review and meta-analysis. *Clin Cardiol*. 2017;40:73-81.
48. van den Bogaard VA, Ta BD, van der Schaaf A, et al. Validation and modification of a prediction model for acute cardiac events in patients with breast cancer treated with radiotherapy based on three-dimensional dose distributions to cardiac substructures. *J Clin Oncol*. 2017;35:1171-1178.
49. Taylor C, Correa C, Duane FK, et al. Estimating the risks of breast cancer radiotherapy: evidence from modern radiation doses to the lungs and heart and from previous randomized trials. *J Clin Oncol*. 2017;35:1641-1649.
50. Cheng YJ, Nie XY, Ji CC, et al. Long-term cardiovascular risk after radiotherapy in women with breast cancer. *J Am Heart Assoc*. 2017;6.
51. Hardy D, Liu CC, Cormier JN, Xia R, Du XL. Cardiac toxicity in association with chemotherapy and radiation therapy in a large cohort of older patients with non-small-cell lung cancer. *Ann Oncol*. 2010;21:1825-1833.

52. Bradley JD, Paulus R, Komaki R, et al. Standard-dose versus high-dose conformal radiotherapy with concurrent and consolidation carboplatin plus paclitaxel with or without cetuximab for patients with stage IIIA or IIIB non-small-cell lung cancer (RTOG 0617): a randomised, two-by-two factorial phase 3 study. *Lancet Oncol.* 2015;16:187-199.
53. Dess RT, Sun Y, Matuszak MM, et al. Cardiac events after radiation therapy: combined analysis of prospective multicenter trials for locally advanced non-small-cell lung cancer. *J Clin Oncol.* 2017;35:1395-1402.
54. McWilliam A, Kennedy J, Hodgson C, Vasquez Osorio E, Faivre-Finn C, van Herk M. Radiation dose to heart base linked with poorer survival in lung cancer patients. *Eur J Cancer.* 2017;85:106-113.
55. Atkins KM, Rawal B, Chaunzwa TL, et al. Cardiac radiation dose, cardiac disease, and mortality in patients with lung cancer. *J Am Coll Cardiol.* 2019;73:2976-2987.
56. Dorresteijn LD, Kappelle AC, Boogerd W, et al. Increased risk of ischemic stroke after radiotherapy on the neck in patients younger than 60 years. *J Clin Oncol.* 2002;20:282-288.
57. Bowers DC, Liu Y, Leisenring W, et al. Late-occurring stroke among long-term survivors of childhood leukemia and brain tumors: a report from the Childhood Cancer Survivor Study. *J Clin Oncol.* 2006;24:5277-5282.
58. Mueller S, Sear K, Hills NK, et al. Risk of first and recurrent stroke in childhood cancer survivors treated with cranial and cervical radiation therapy. *Int J Rad Oncol Biol Phys.* 2013;86:643-648.
59. Sun CL, Kersey JH, Francisco L, et al. Burden of morbidity in 10+ year survivors of hematopoietic cell transplantation: report from the bone marrow transplantation survivor study. *Biol Blood Marrow Transplant.* 2013;19:1073-80.
60. Chu CN, Chen SW, Bai LY, Mou CH, Hsu CY, Sung FC. Increase in stroke risk in patients with head and neck cancer: a retrospective cohort study. *Br J Cancer.* 2011;105:1419-1423.



61. Lin SH, Wang L, Myles B, et al. Propensity score-based comparison of long-term outcomes with 3-dimensional conformal radiotherapy vs intensity-modulated radiotherapy for esophageal cancer. *Int J Rad Oncol Biol Phys*. 2012;84:1078-1085.
62. Swisher-McClure S, Mitra N, Lin A, et al. Risk of fatal cerebrovascular accidents after external beam radiation therapy for early-stage glottic laryngeal cancer. *Head Neck*. 2014;36:611-616.
63. Liao J, Liu T, Zhang H, Cai F, Chen J, Dang J. The role of postoperative radiation therapy for completely resected stage III thymoma and effect of higher heart radiation dose on risk of cardiovascular disease: A retrospective cohort study. *Int J Surg*. 2018;53:345-349.
64. DeZorzi C. Radiation-induced coronary artery disease and its treatment: a quick review of current evidence. *Cardiol Res Practice*. 2018;2018:8367268.
65. Murphy ES, Xie H, Merchant TE, Yu JS, Chao ST, Suh JH. Review of cranial radiotherapy-induced vasculopathy. *J Neuro-Oncol*. 2015;122:421-429.
66. Krochak RJ, Baker DG. Radiation nephritis. Clinical manifestations and pathophysiologic mechanisms. *Urology*. 1986;27:389-393.
67. Jurado JA, Bashir R, Burket MW. Radiation-induced peripheral artery disease. *Catheter Cardiovasc Interv*. 2008;72:563-568.
68. Seregard S, Pelayes DE, Singh AD. Radiation therapy: posterior segment complications. *Develop Ophthalmol*. 2013;52:114-123.
69. Lumbroso L, Dendale R, Fourquet A, Desjardins L. Radiation-induced retinopathy. *Cancer Radiother*. 2002;6:289-295.
70. Zamorano JL, Lancellotti P, Rodriguez Munoz D, et al. 2016 ESC Position Paper on cancer treatments and cardiovascular toxicity developed under the auspices of the ESC Committee for Practice Guidelines: The Task Force for cancer treatments and cardiovascular toxicity of the European Society of Cardiology (ESC). *Eur Heart J*. 2016;37:2768-2801.
71. Cohen JB, Geara AS, Hogan JJ, Townsend RR. Hypertension in cancer patients and survivors: epidemiology, diagnosis, and management. *JACC CardioOncol*. 2019;1:238-251.

72. Abdel-Qadir H, Fang J, Lee DS, et al. Importance of considering competing risks in time-to-event analyses: application to stroke risk in a retrospective cohort study of elderly patients with atrial fibrillation. *Circ Cardiovasc Qual Outcomes*. 2018;11:e004580.
73. Williams B, Mancia G, Spiering W, et al. 2018 ESC/ESH Guidelines for the management of arterial hypertension. *Eur Heart J*. 2018;39:3021-3104.
74. Lopez-Fernandez T, Martin Garcia A, Santaballa Beltran A, et al. Cardio-onco-hematology in clinical practice. Position Paper and Recommendations. *Rev Esp Cardiol*. 2017;70:474-486.
75. Dickerson T, Wiczor T, Waller A, et al. Hypertension and incident cardiovascular events following ibrutinib initiation. *Blood*. 2019;134:1919-1928.
76. Mertens AC, Liu Q, Neglia JP, et al. Cause-specific late mortality among 5-year survivors of childhood cancer: the Childhood Cancer Survivor Study. *J Nat Cancer Inst*. 2008;100:1368-1379.
77. Lipshultz SE, Adams MJ, Colan SD, et al. Long-term cardiovascular toxicity in children, adolescents, and young adults who receive cancer therapy: pathophysiology, course, monitoring, management, prevention, and research directions: a scientific statement from the American Heart Association. *Circulation*. 2013;128:1927-1995.
78. Lapirow D, La Gerche A, Toro C, et al. The Australia and New Zealand Cardio-Oncology Registry (ACOR): evaluation of chemotherapy-related cardiotoxicity in a national cohort of paediatric cancer patients. *Intern Med*. 2019.
79. Khanna A, Pequeno P, Gupta S, et al. Increased risk of all cardiovascular disease subtypes among childhood cancer survivors: population-based matched cohort study. *Circulation*. 2019;140:1041-1043.
80. Hau EM, Caccia JN, Kasteler R, et al. Cardiovascular disease after childhood acute lymphoblastic leukaemia: a cohort study. *Swiss Med*. 2019;149:w20012.
81. Bagnasco F, Caruso S, Andreano A, et al. Late mortality and causes of death among 5-year survivors of childhood cancer diagnosed in the period 1960-1999 and registered in the Italian Off-Therapy Registry. *Eur J Cancer*. 2019;110:86-97.

82. Fidler MM, Reulen RC, Henson K, et al. Population-based long-term cardiac-specific mortality among 34 489 five-year survivors of childhood cancer in Great Britain. *Circulation*. 2017;135:951-963.
83. Feijen EA, Font-Gonzalez A, van Dalen EC, et al. Late cardiac events after childhood cancer: methodological aspects of the Pan-European Study PanCareSurFup. *PloS One*. 2016;11:e0162778.
84. Armstrong GT, Oeffinger KC, Chen Y, et al. Modifiable risk factors and major cardiac events among adult survivors of childhood cancer. *J Clin Oncol*. 2013;31:3673-3680.
